# Supplementary material for: Complex Ancestries of Lager-Brewing Hybrids Were Shaped by Standing Variation in the Wild Yeast Saccharomyces eubayanus
Source: PubMed Central journal article supplement (PMC4934787; doi:10.1371/journal.pgen.1006155), 2016-07-06

# Chromosome III

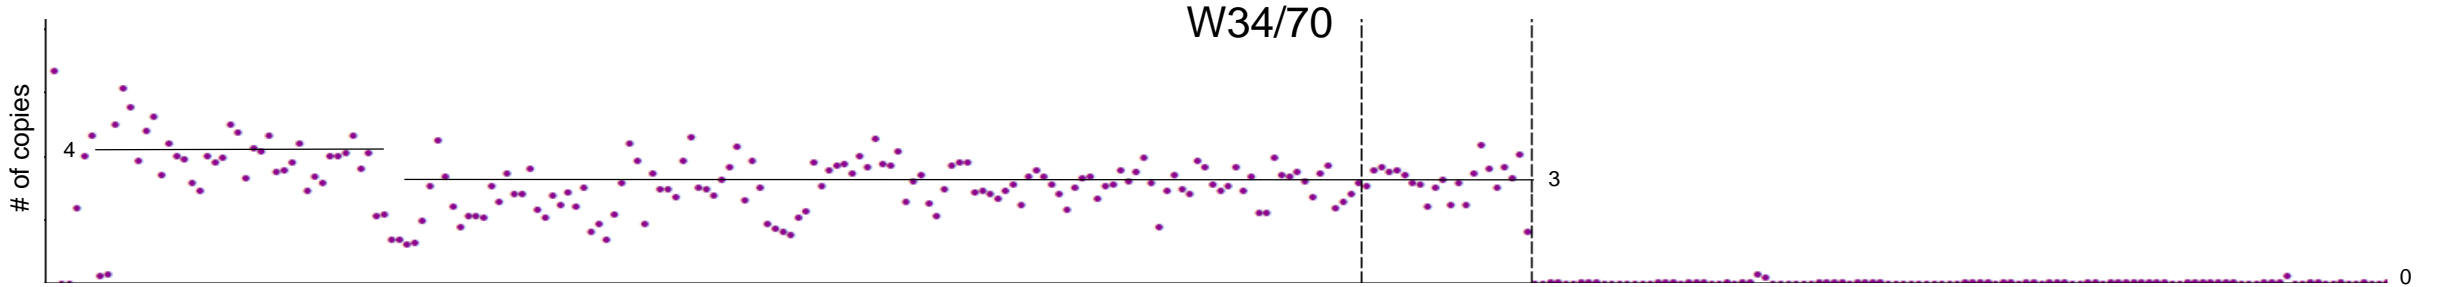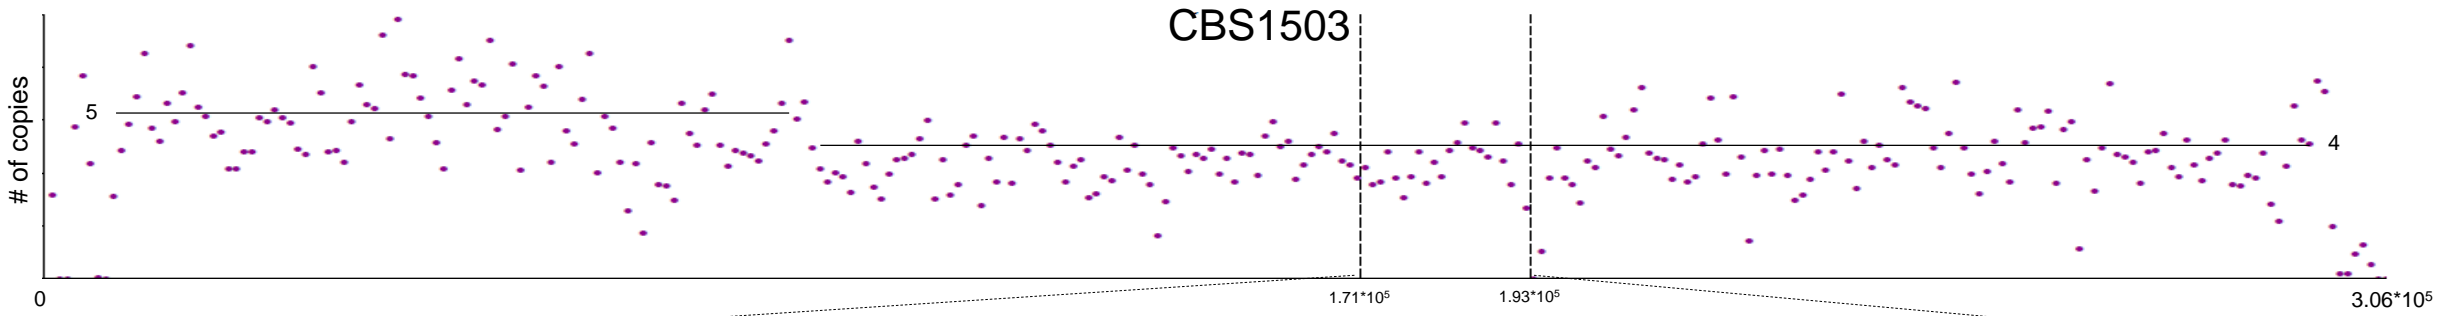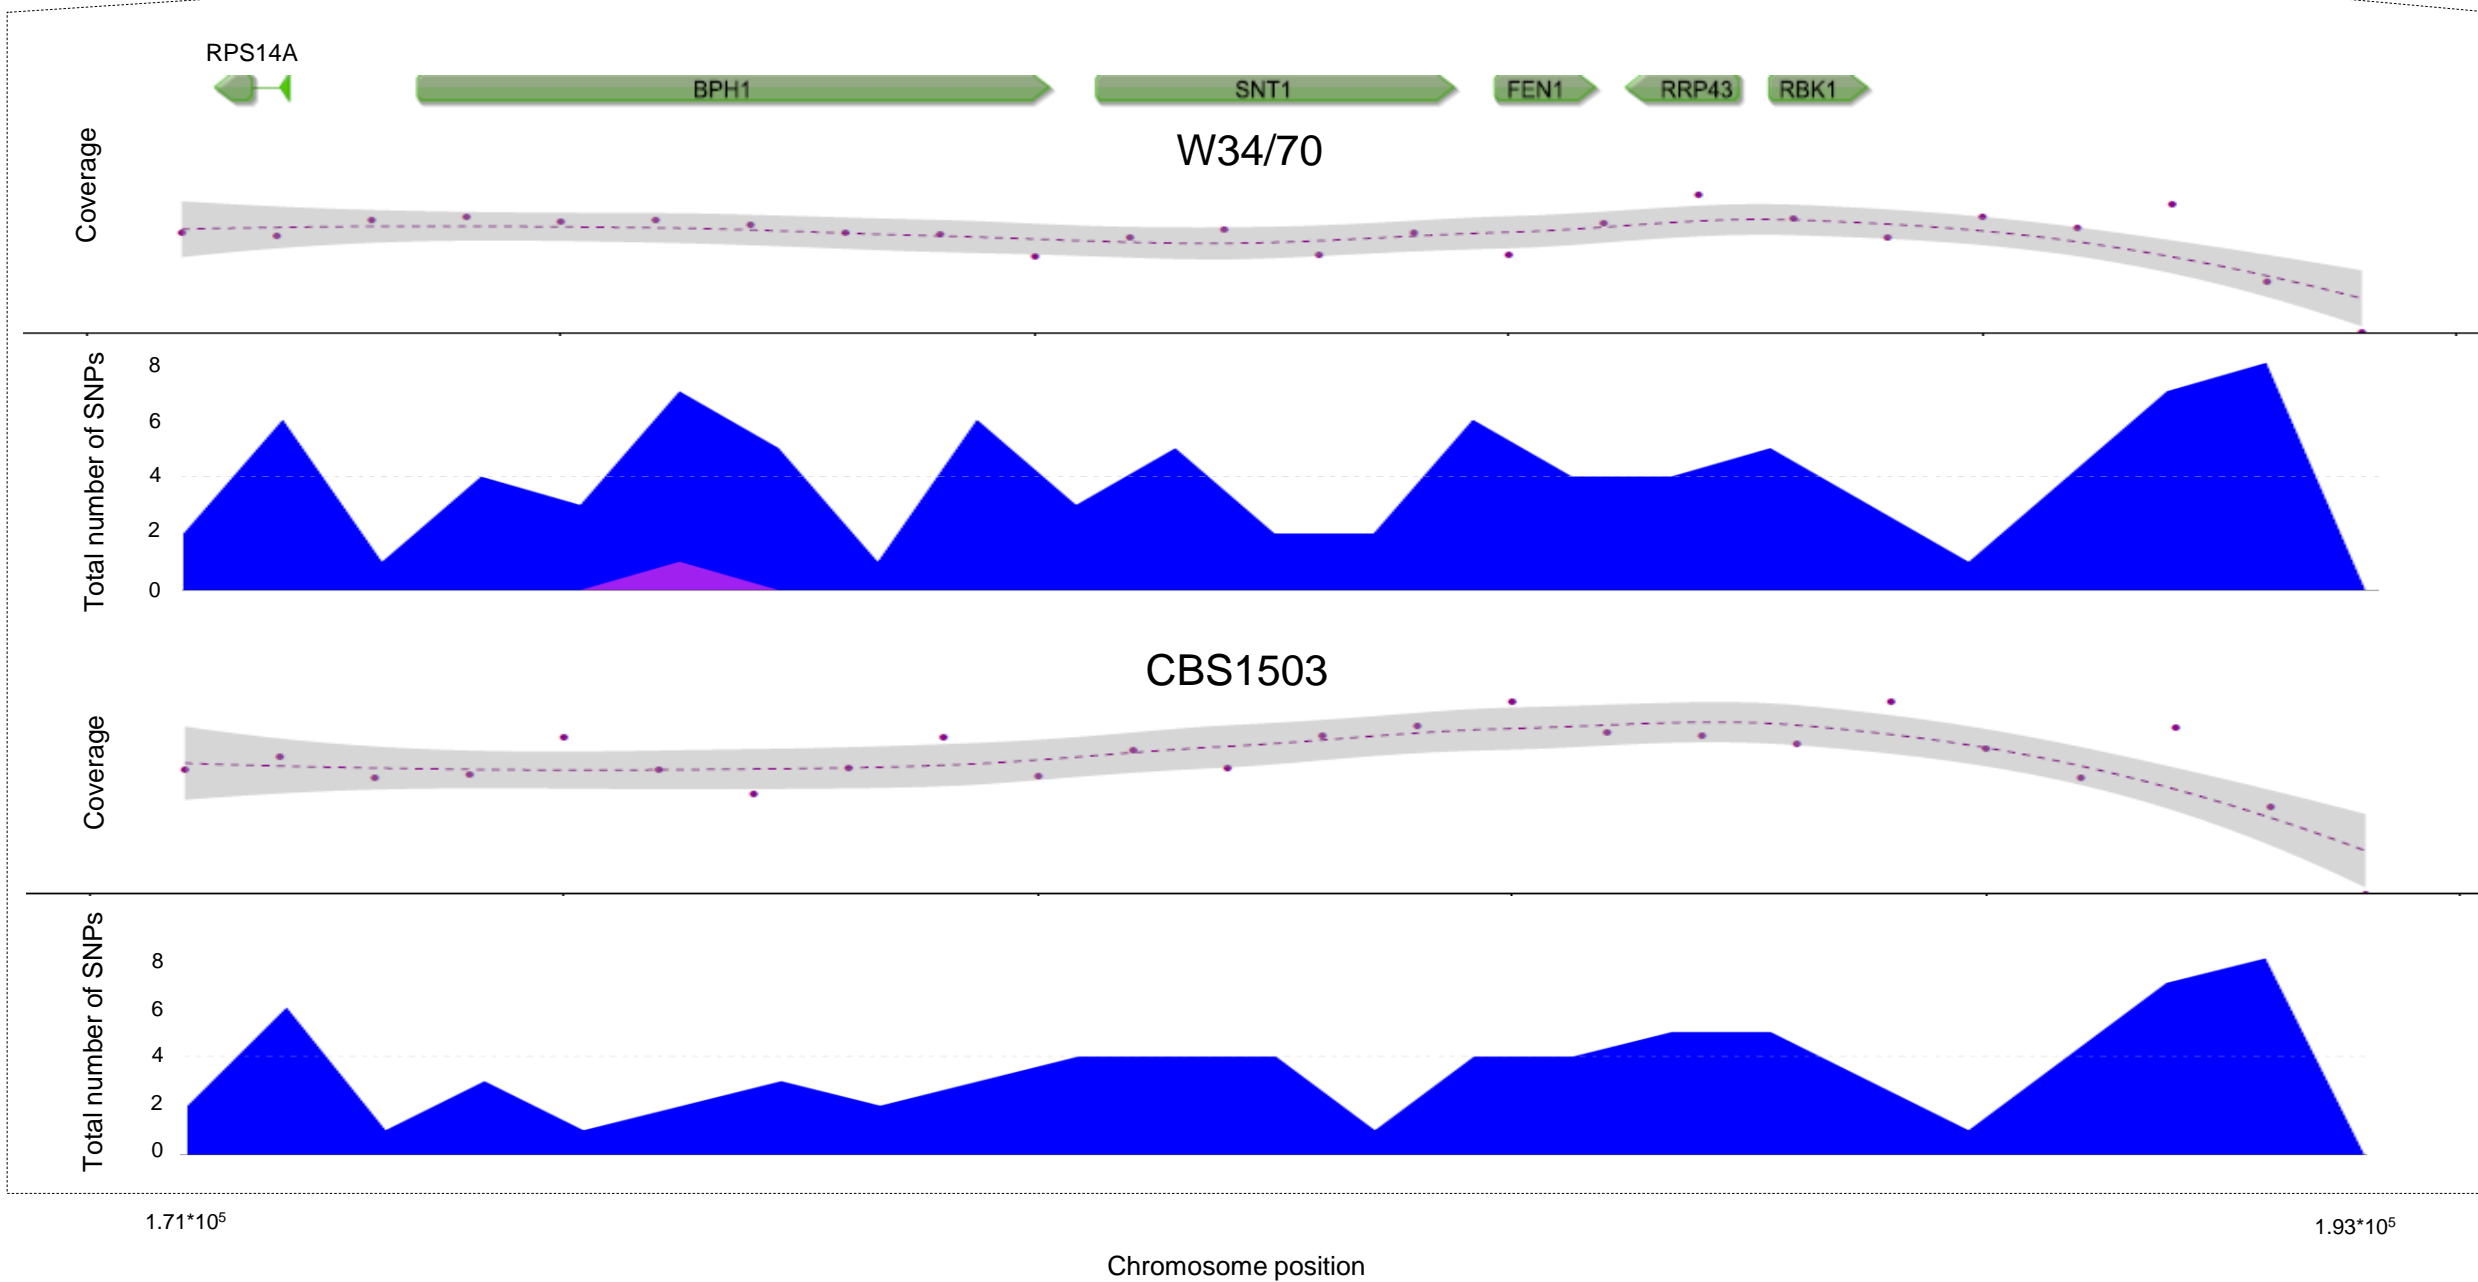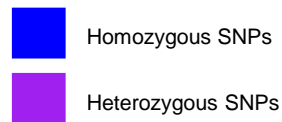

# Chromosome IV

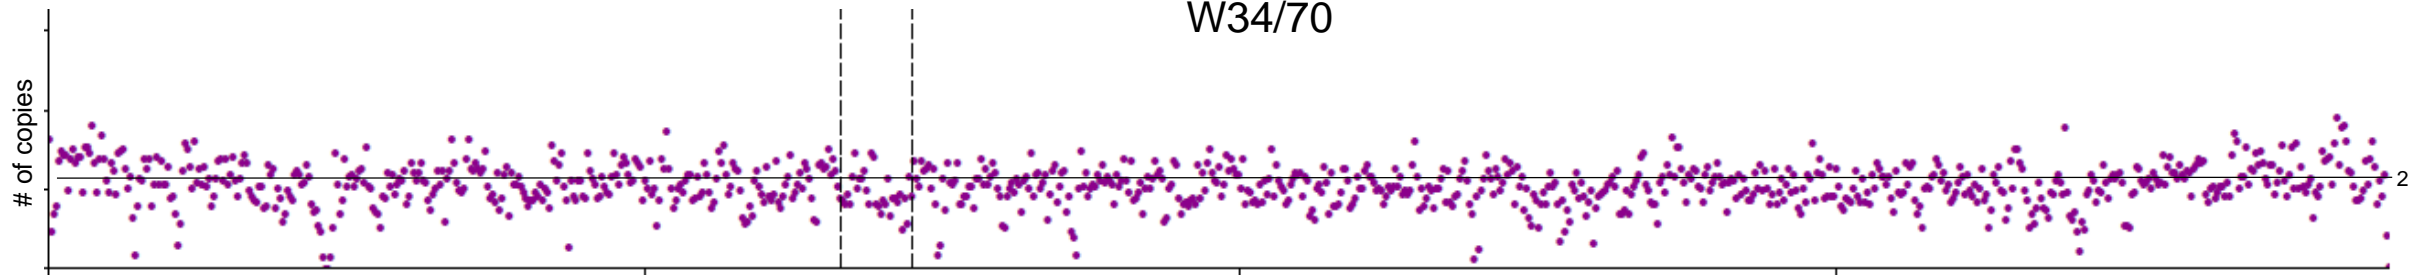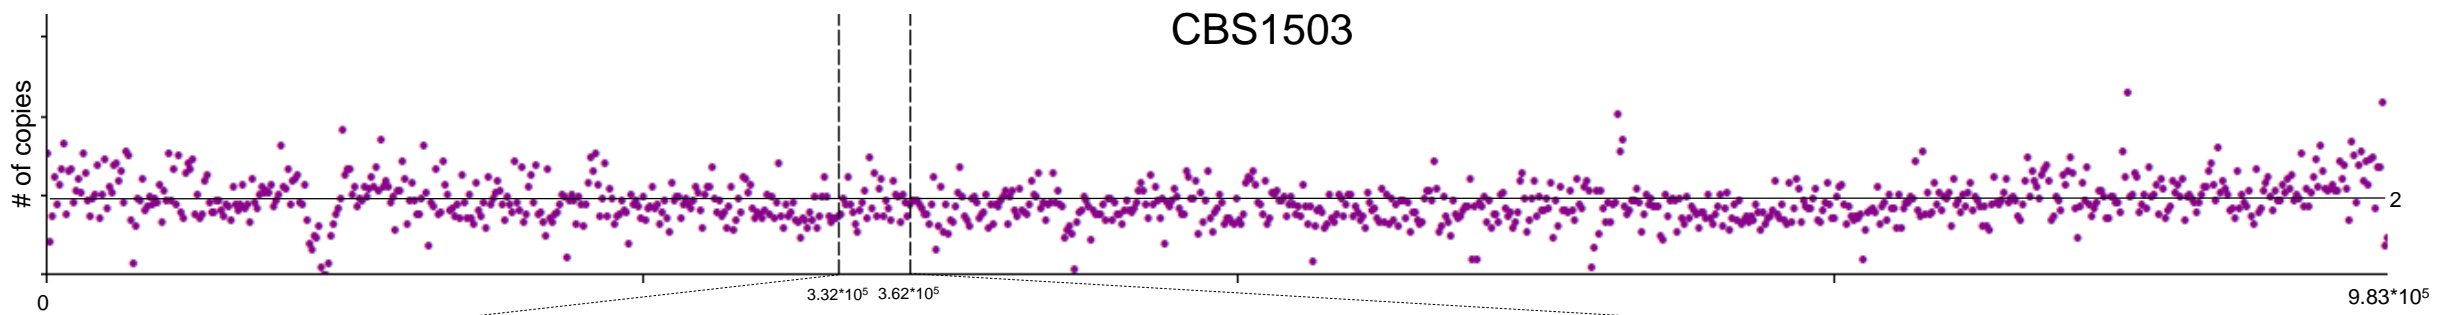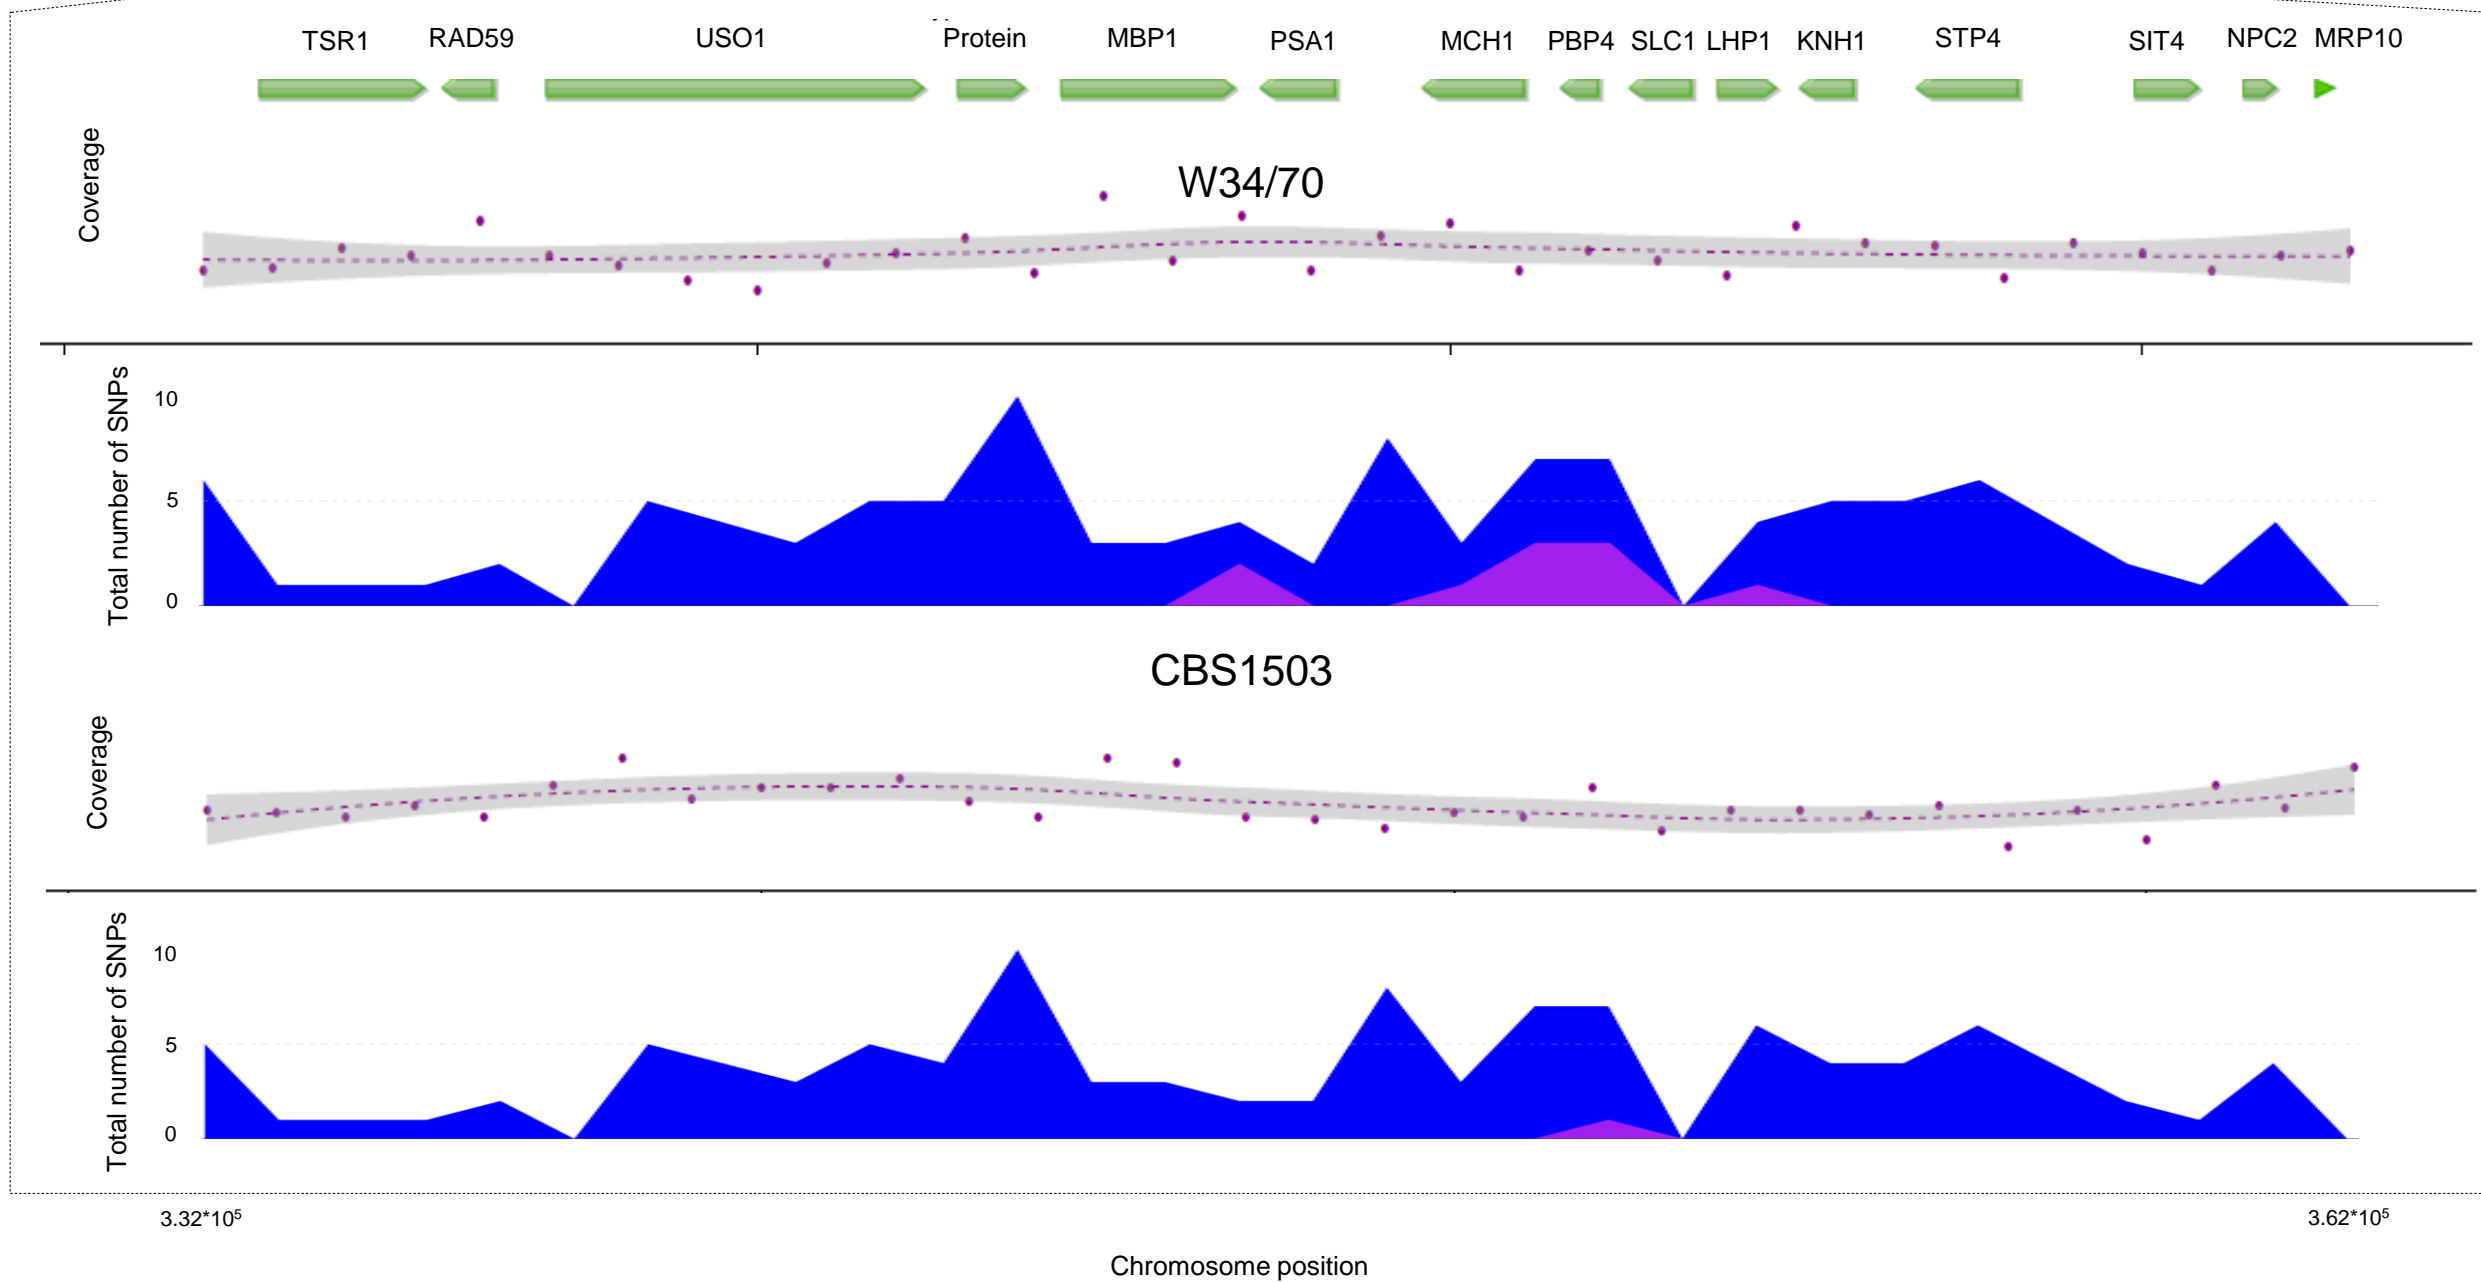

# Chromosome VIII

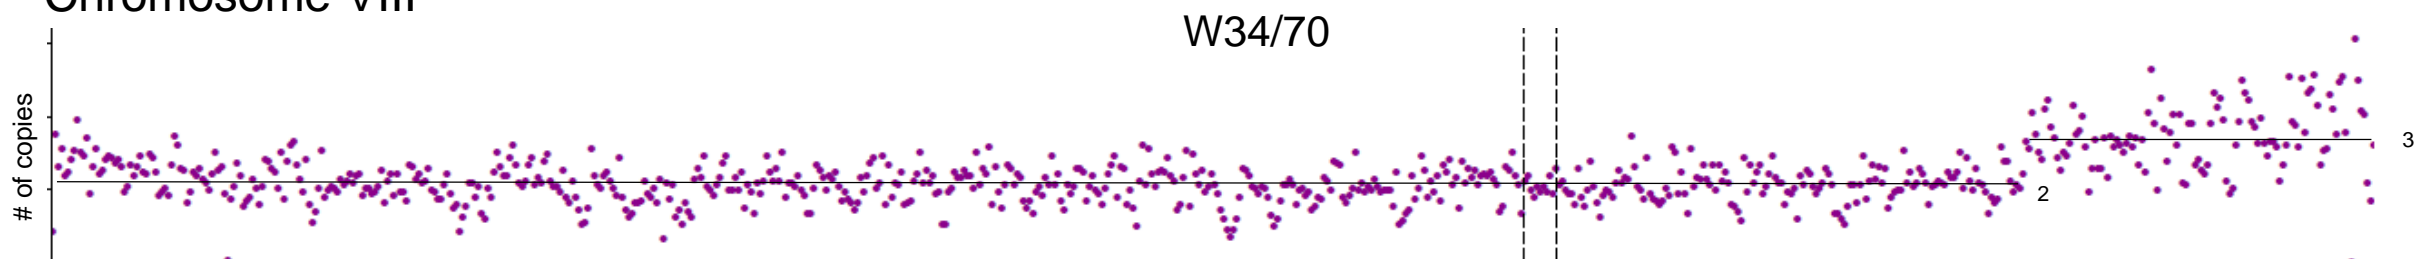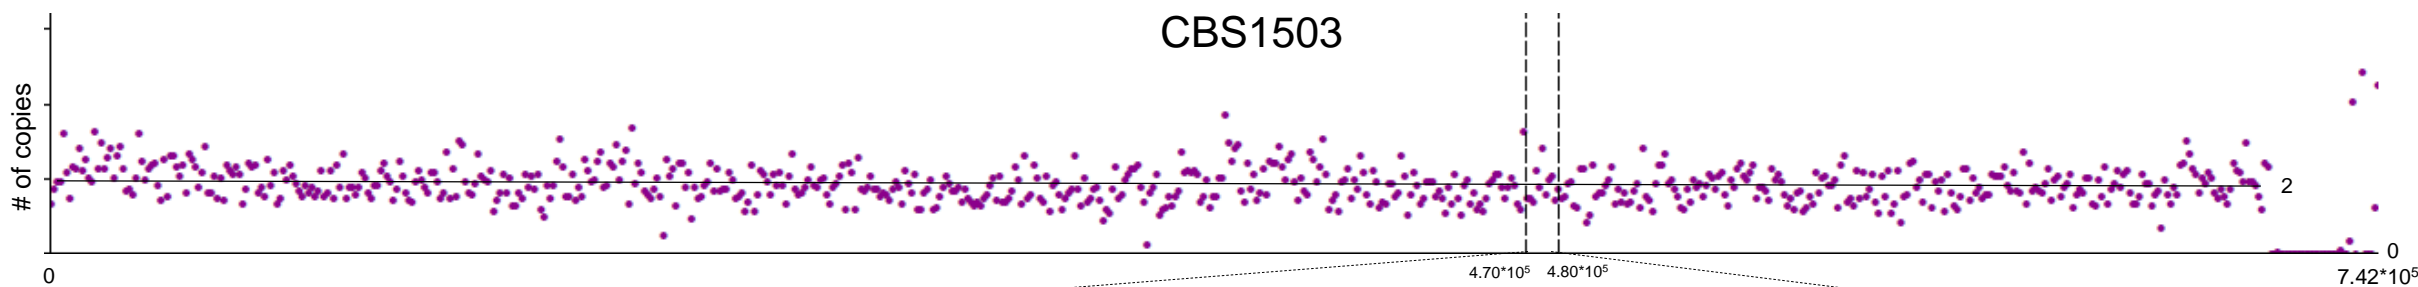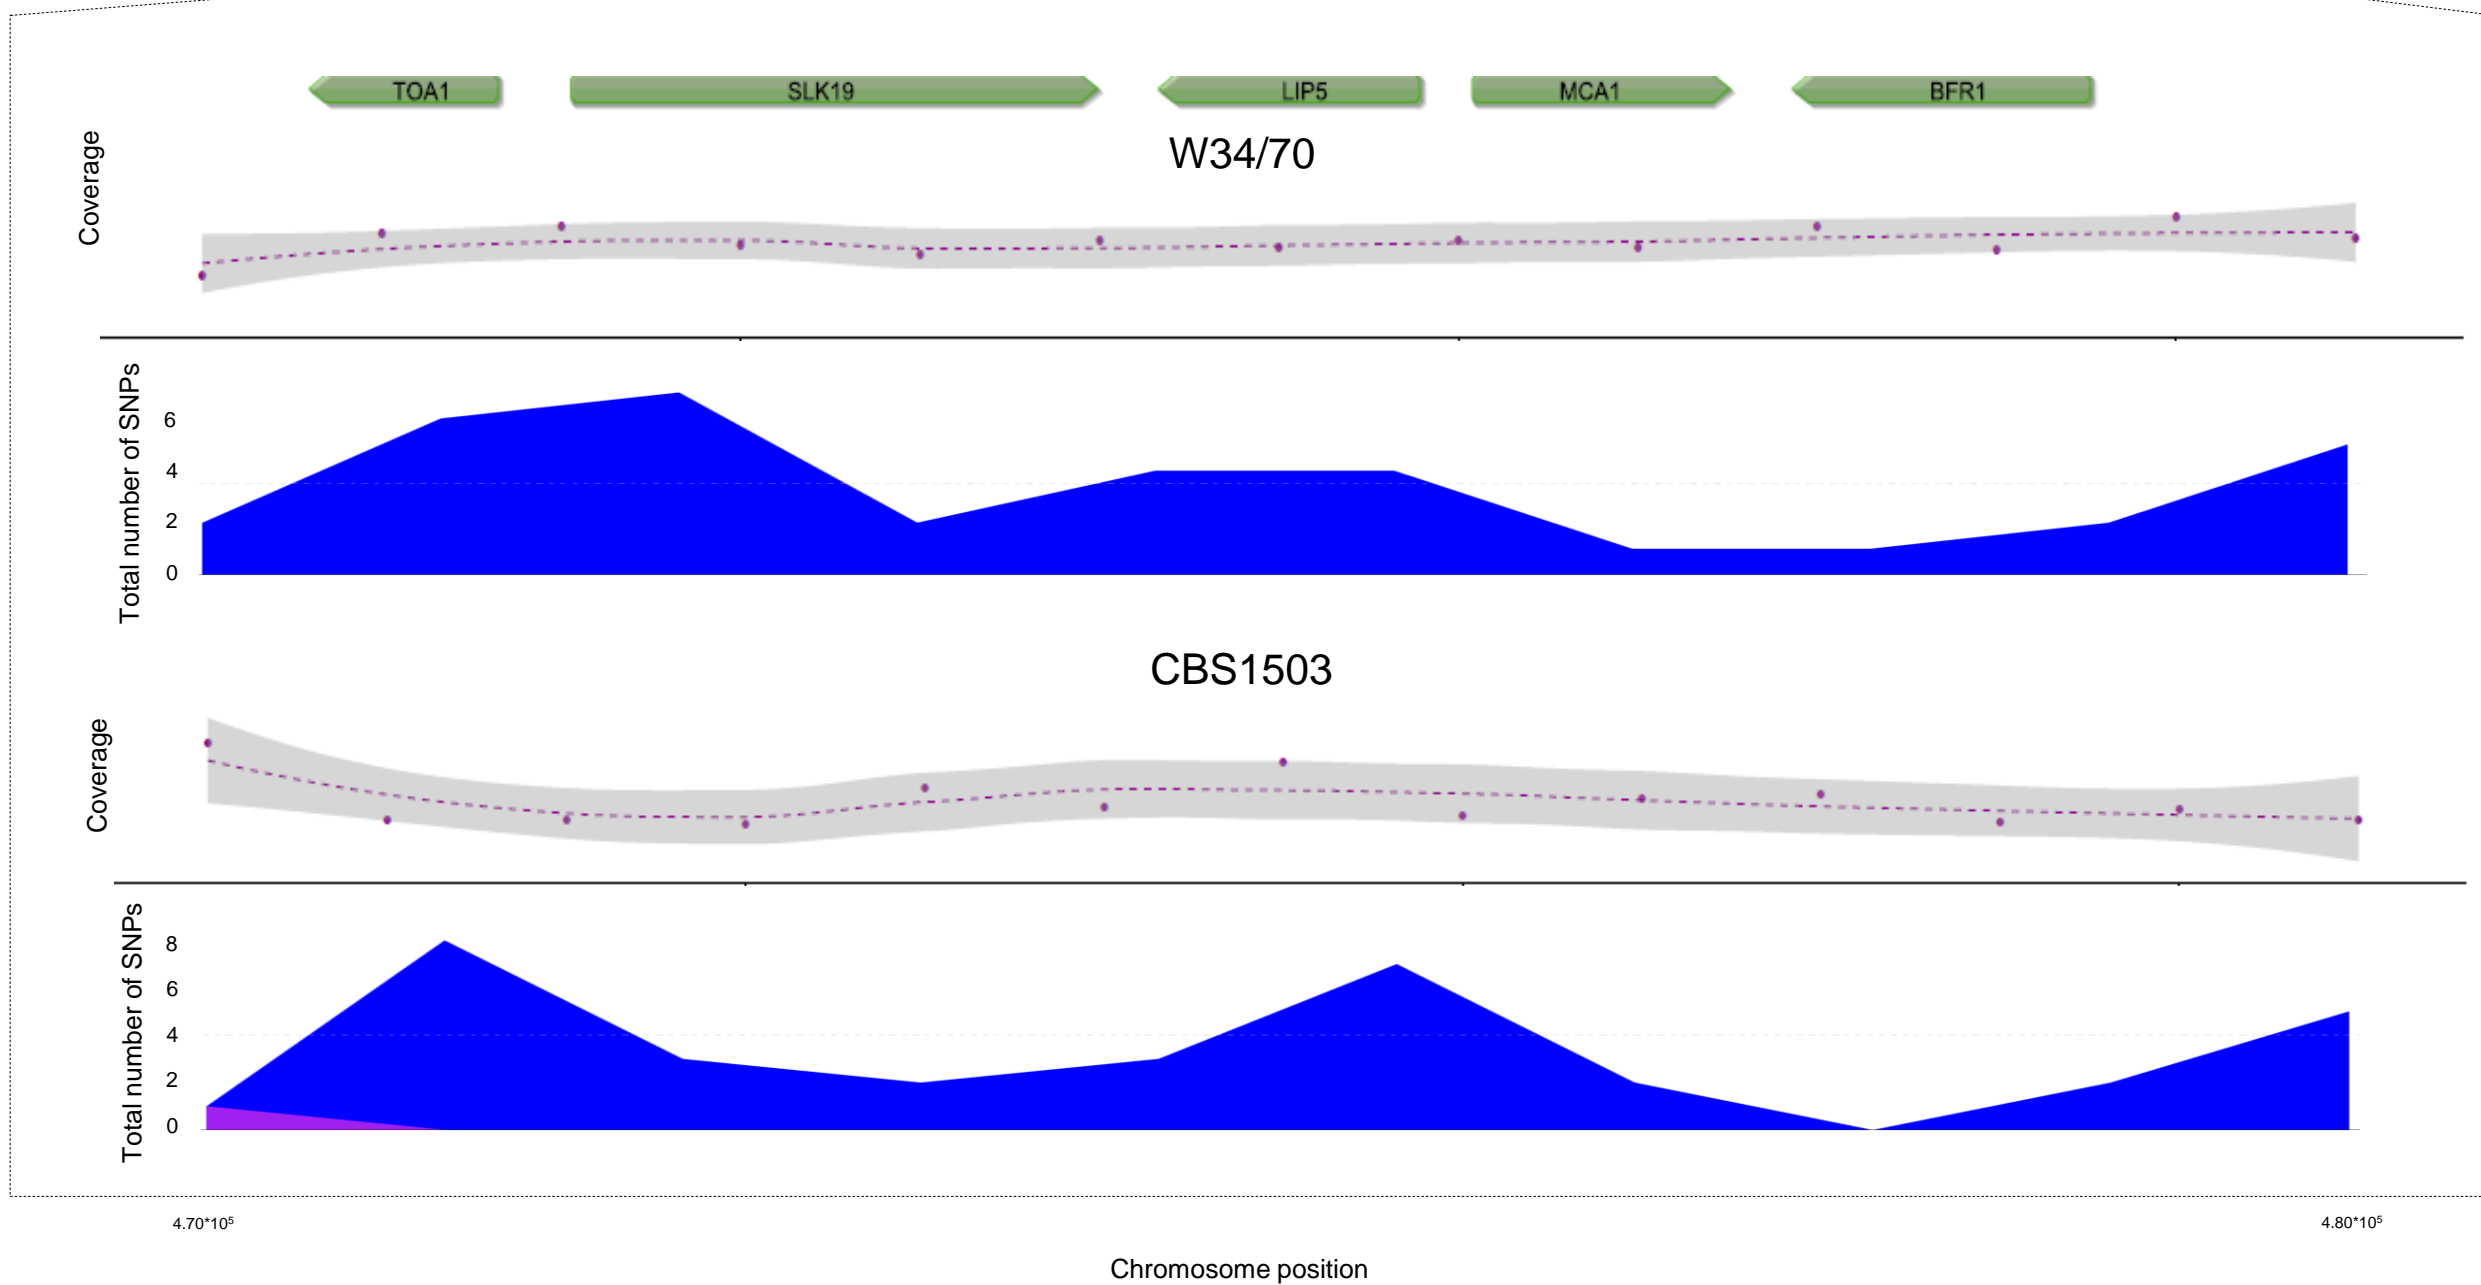

# Chromosome X

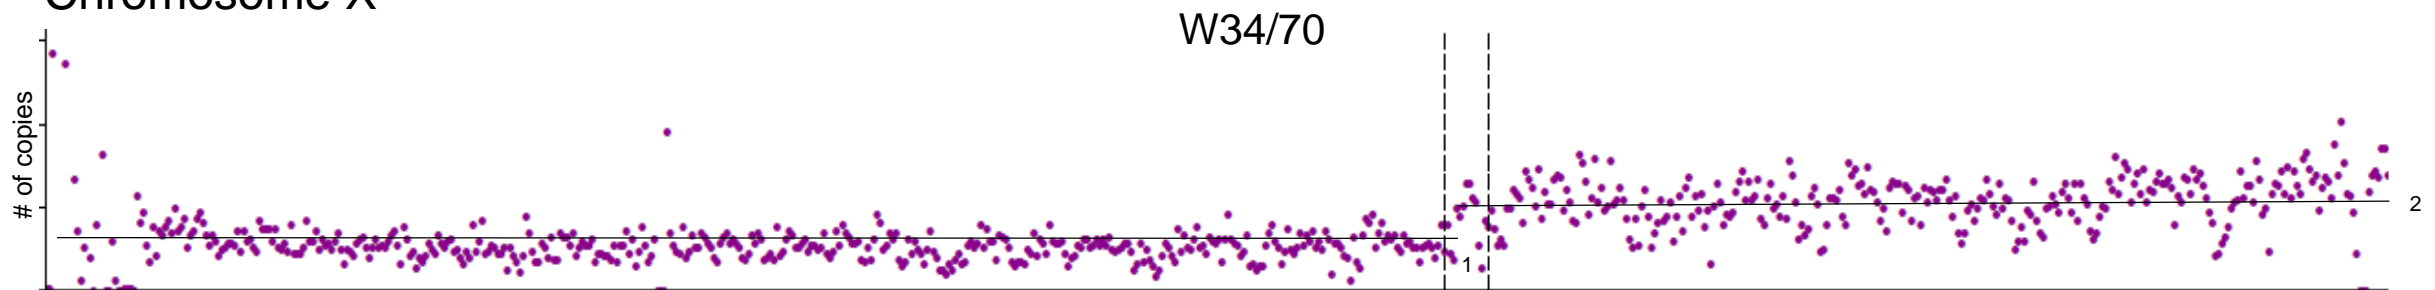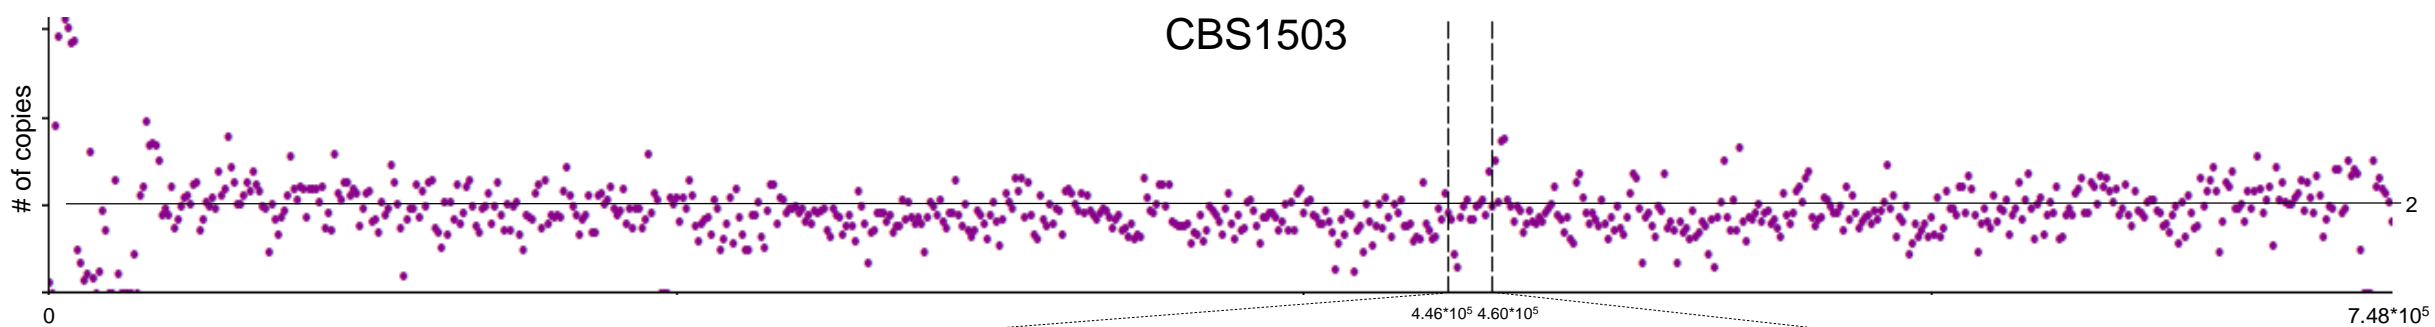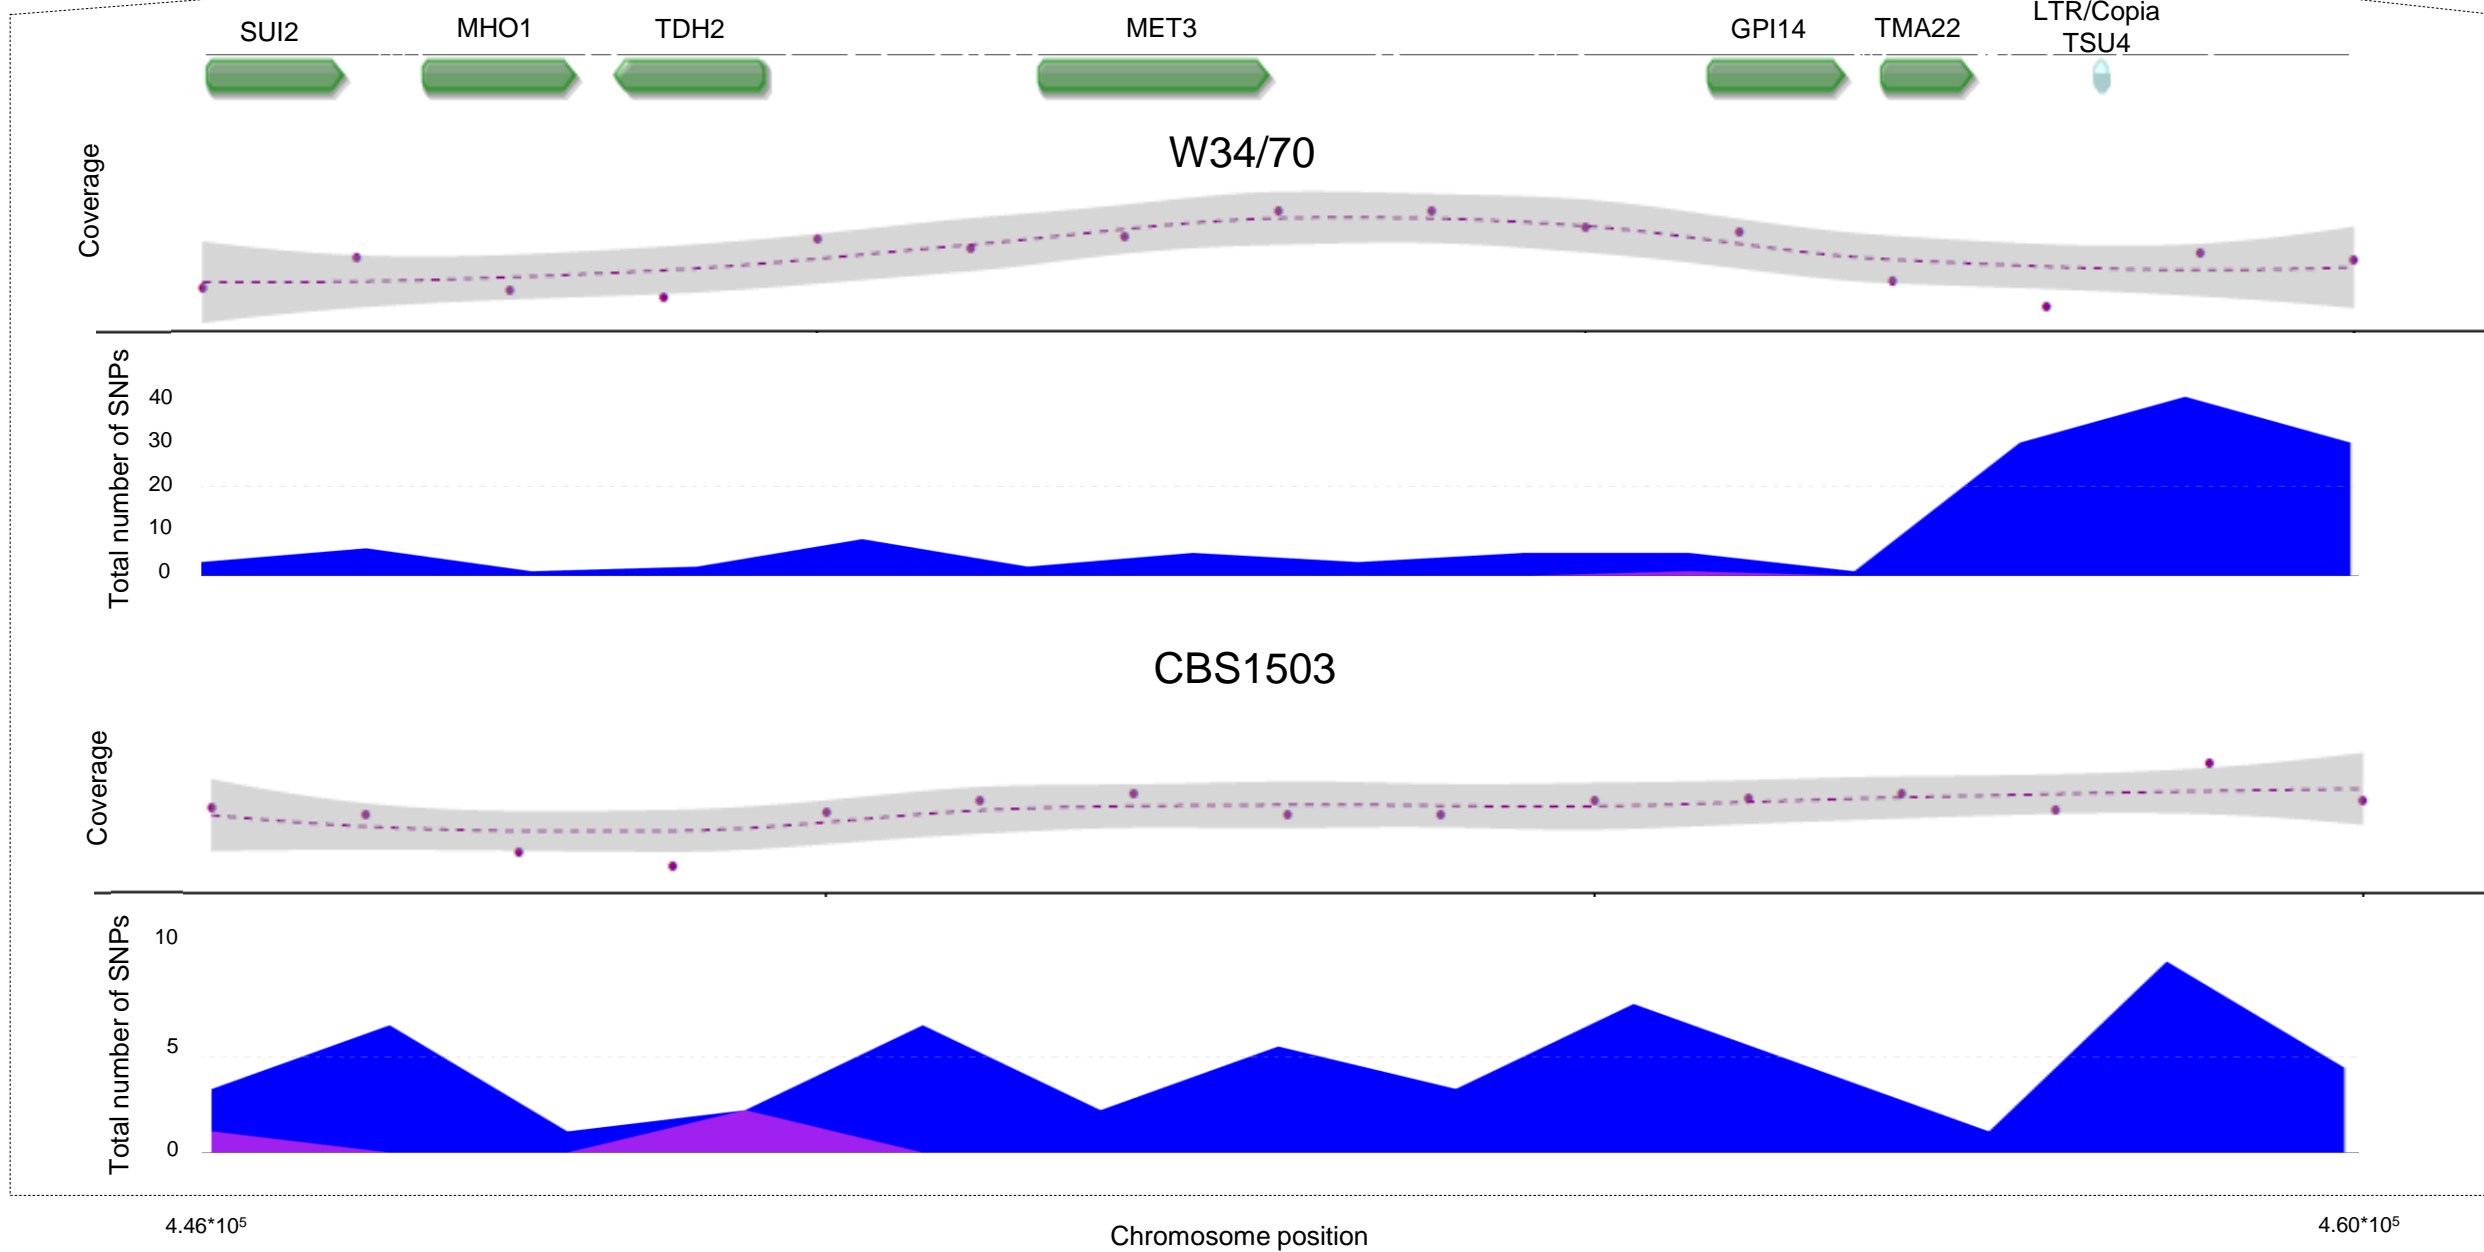

# Chromosome XI

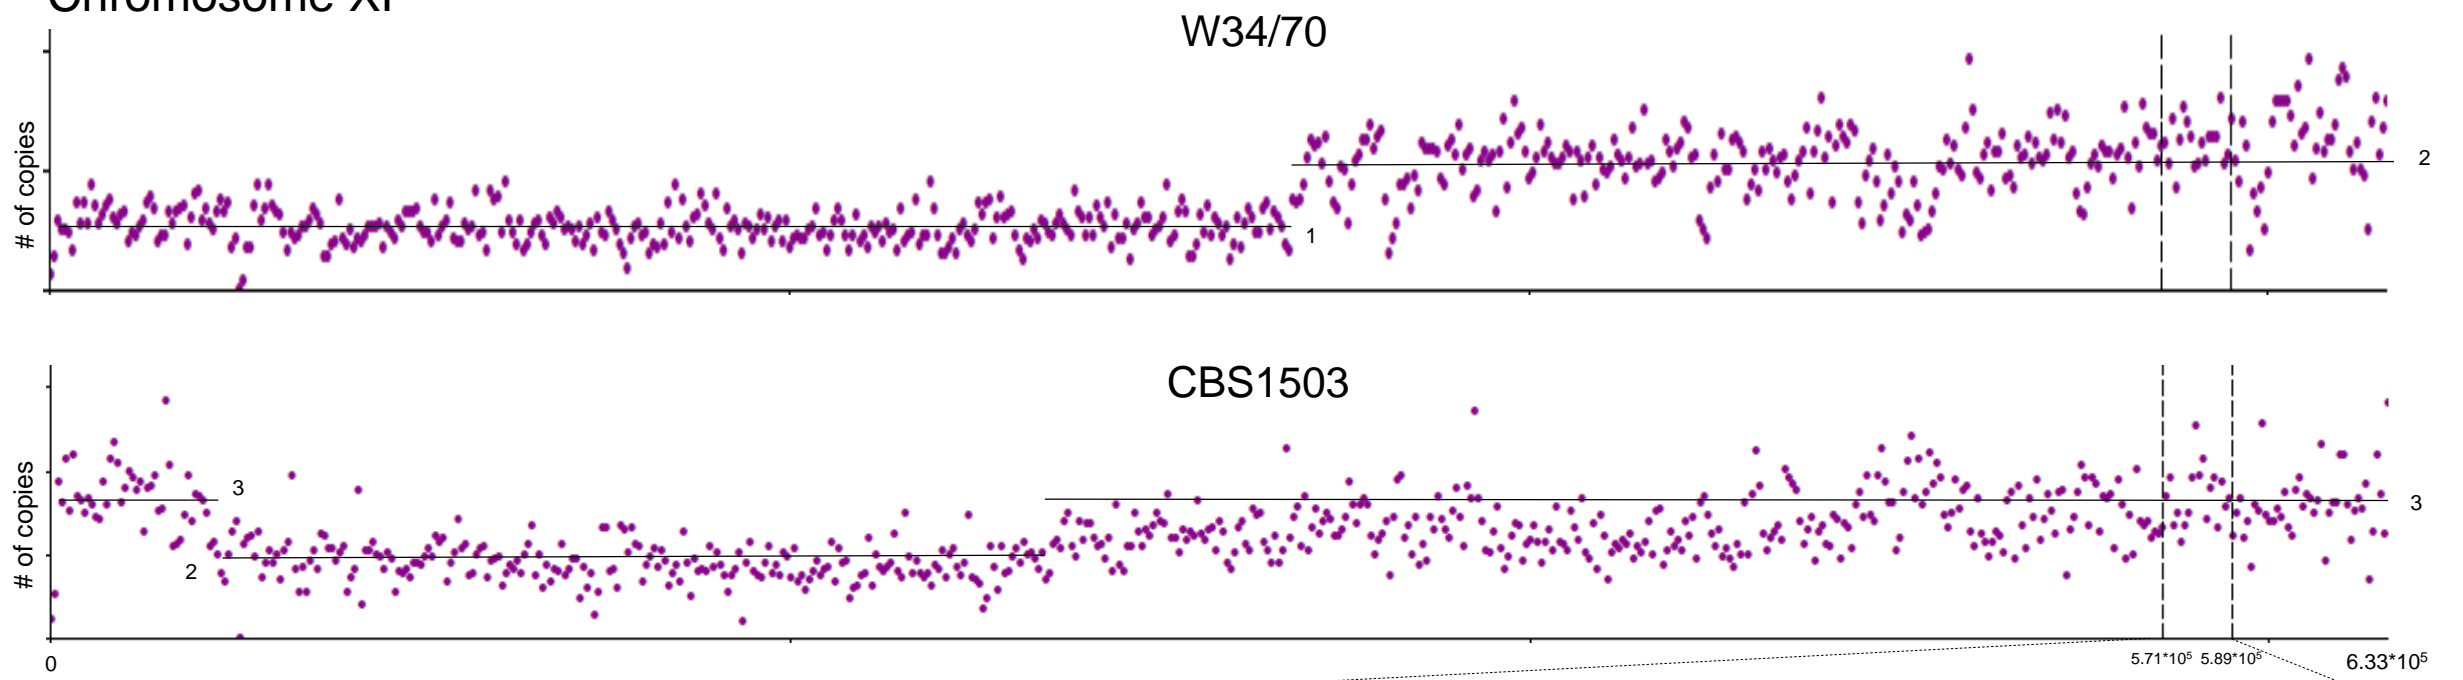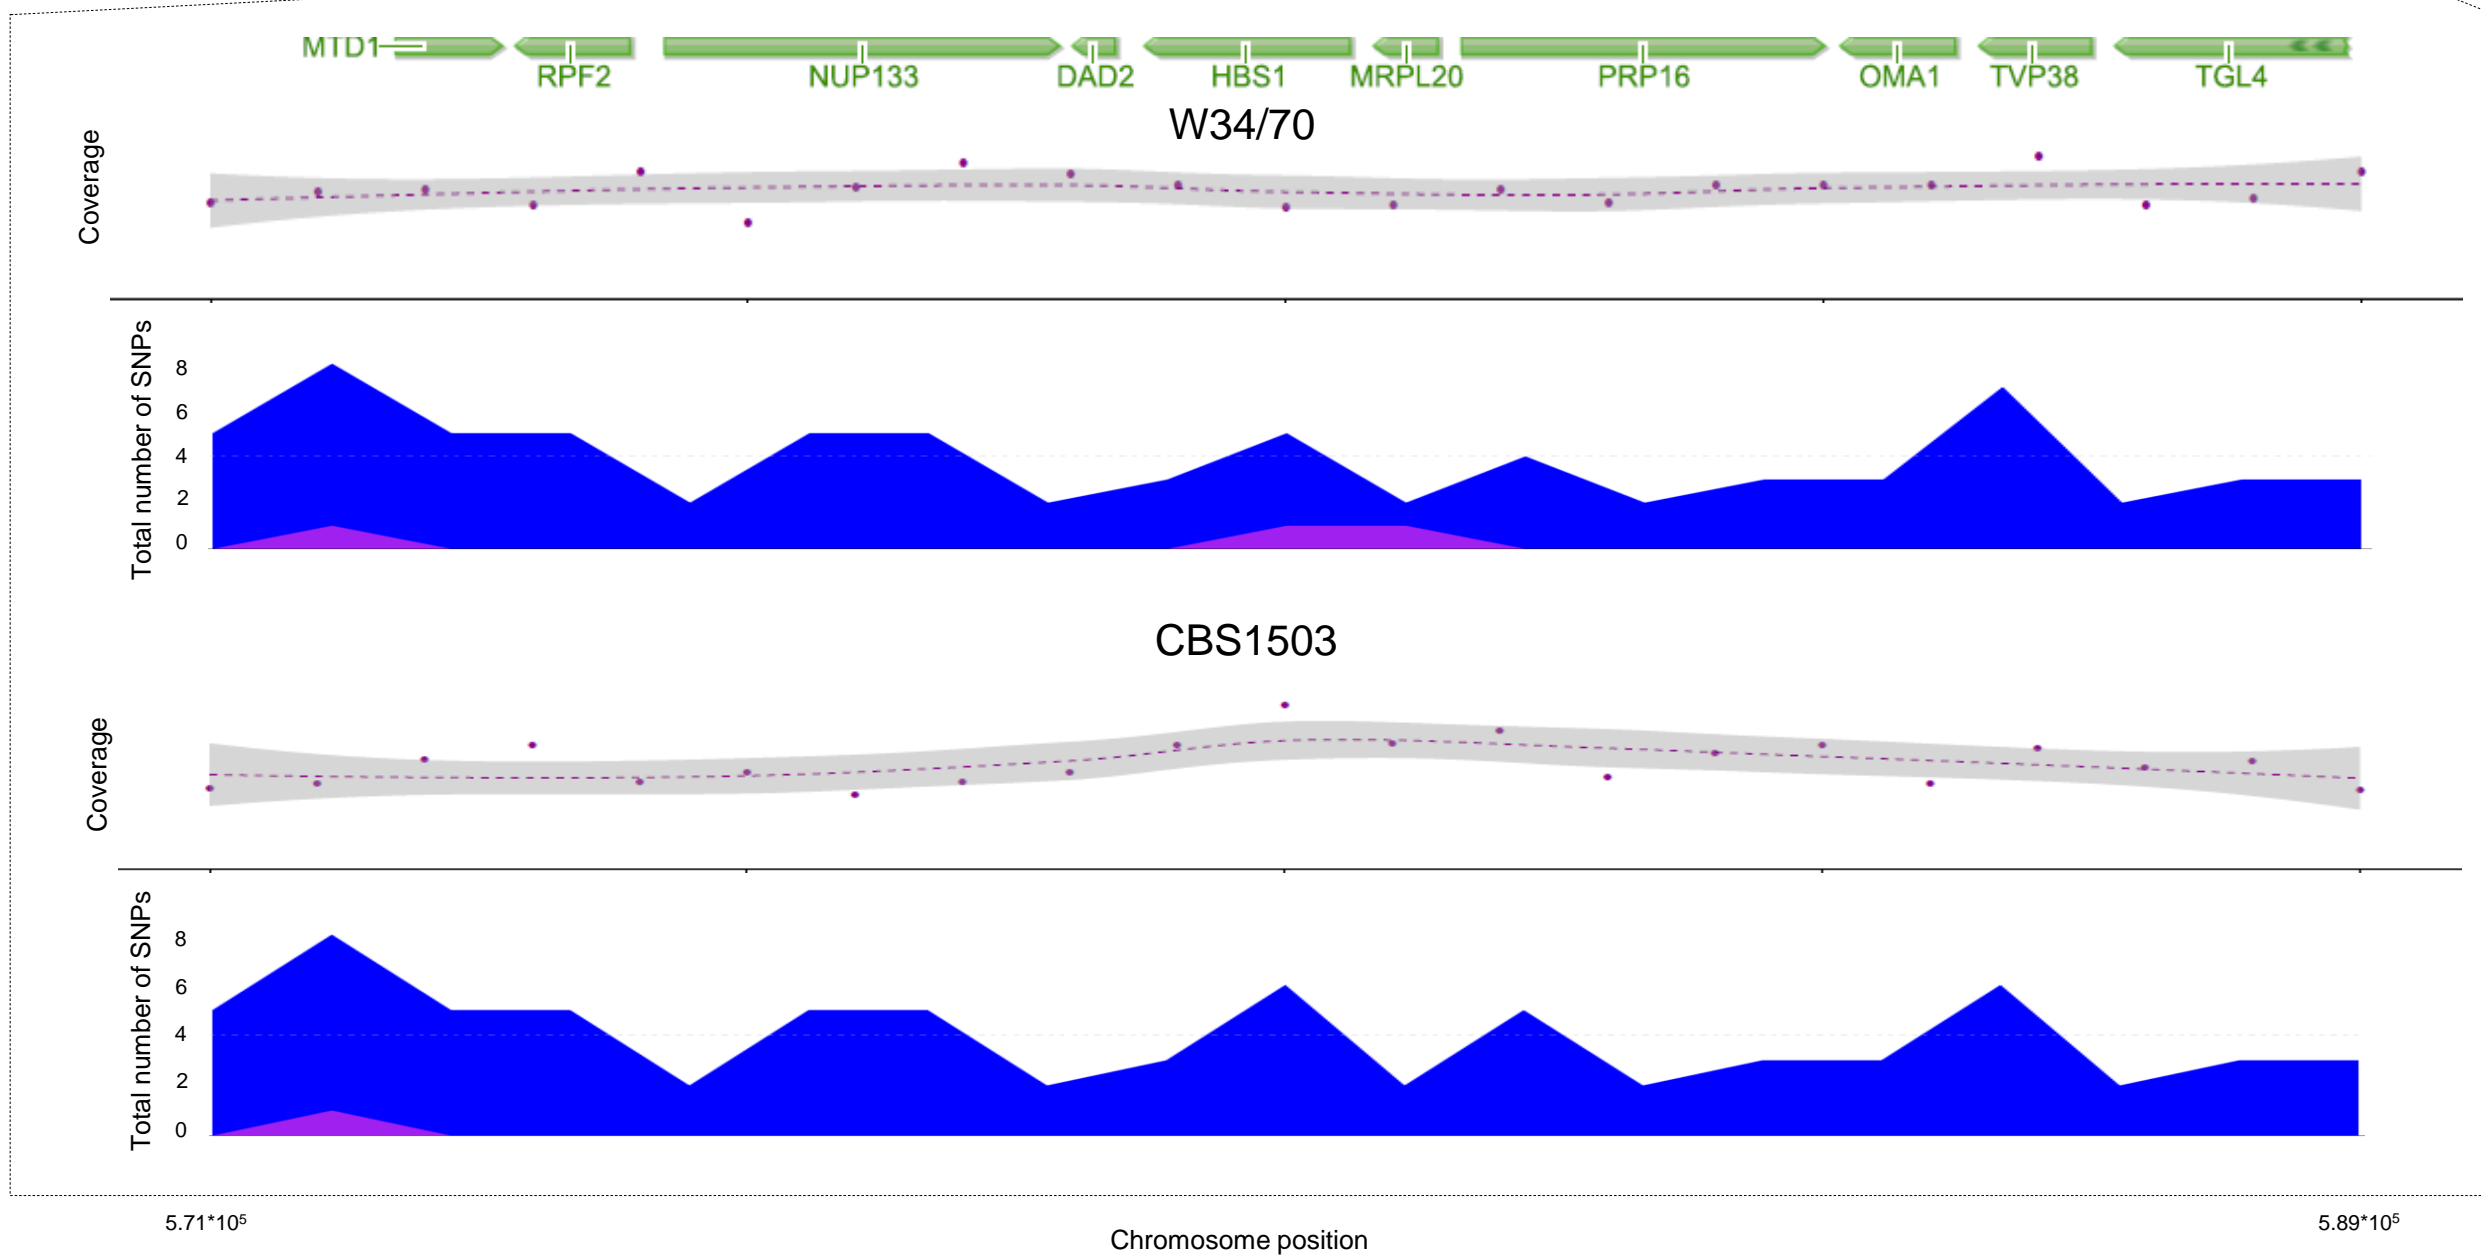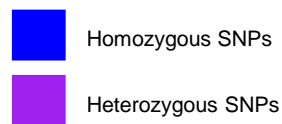

Supplement: pgen.1006155.s015.pdf [file pgen.1006155.s015.pdf]
