# Supplementary material for: Complex Ancestries of Lager-Brewing Hybrids Were Shaped by Standing Variation in the Wild Yeast Saccharomyces eubayanus
Source: PubMed Central journal article supplement (PMC4934787; doi:10.1371/journal.pgen.1006155), 2016-07-06

A

## CBS1503

● *S. eubayanus*

# of copies

read coverage/median read coverage

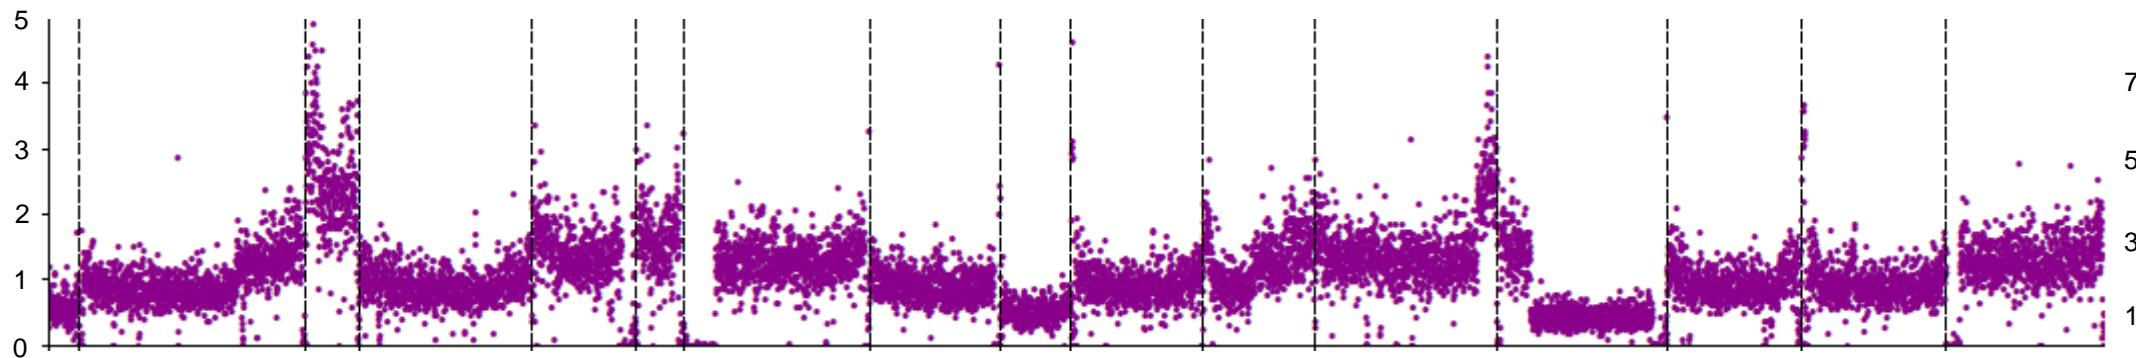

Total number of SNPs

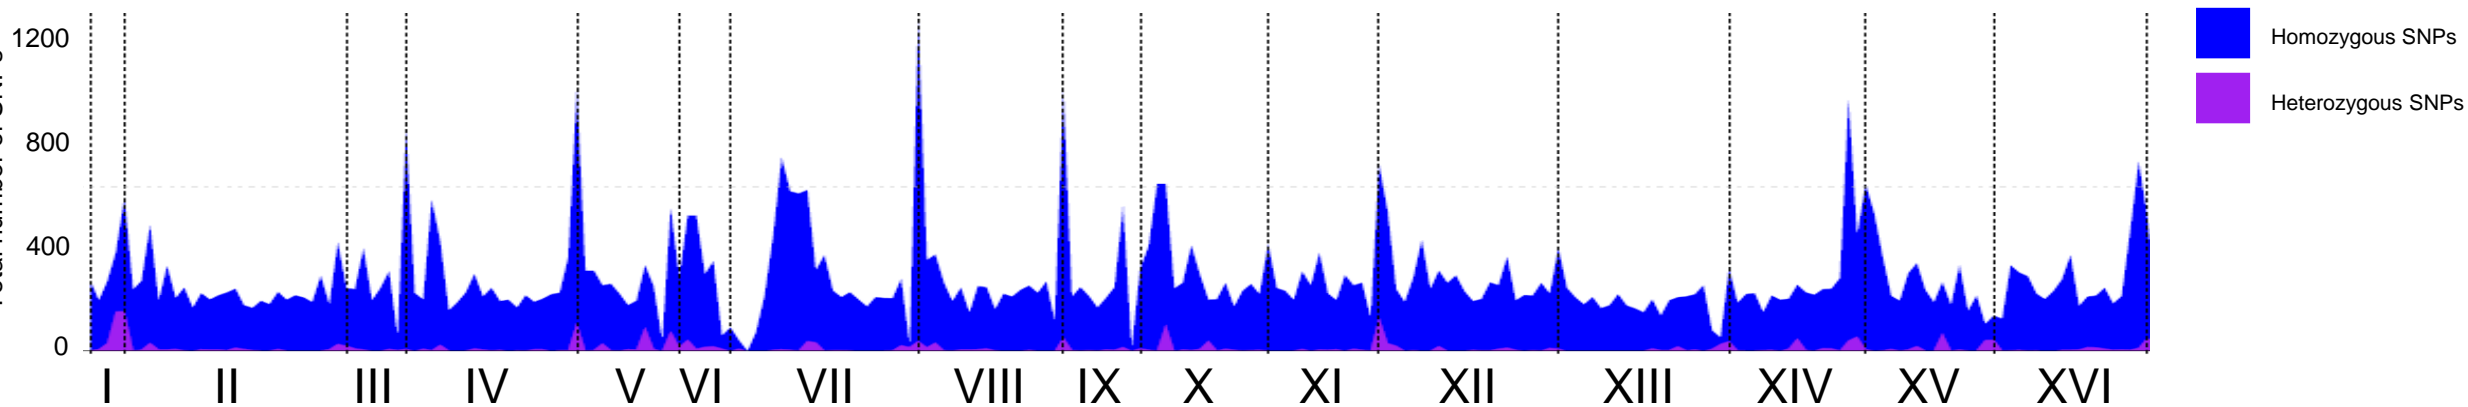

**B****W34/70****● *S. eubayanus***

# of copies

read coverage/median read coverage

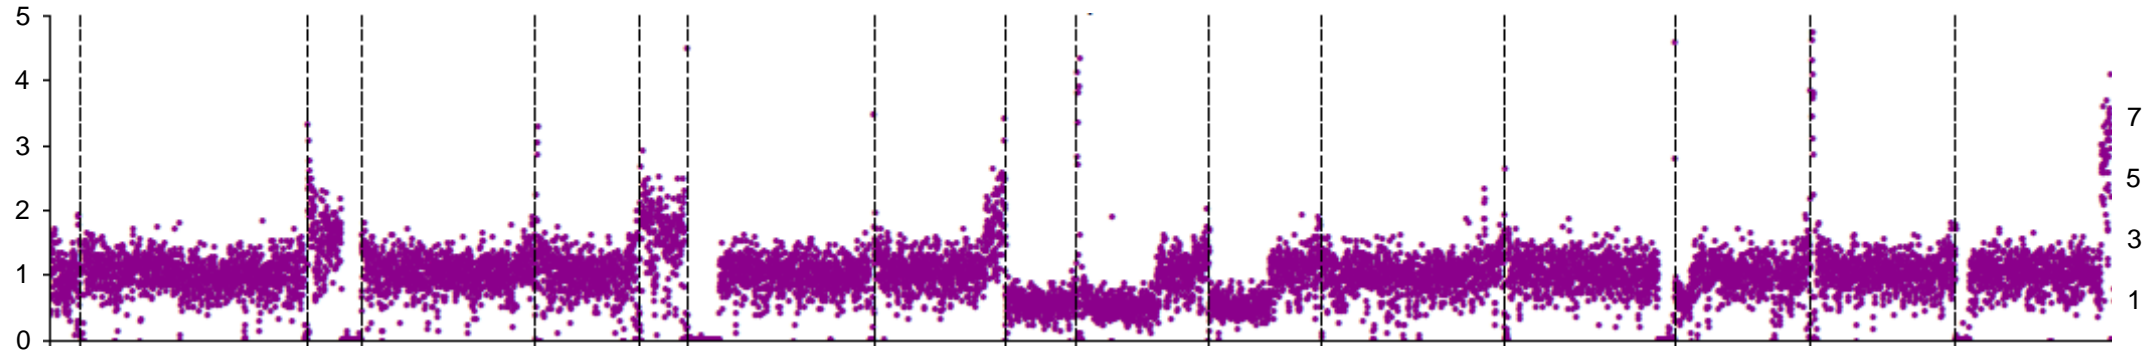

Total number of SNPs

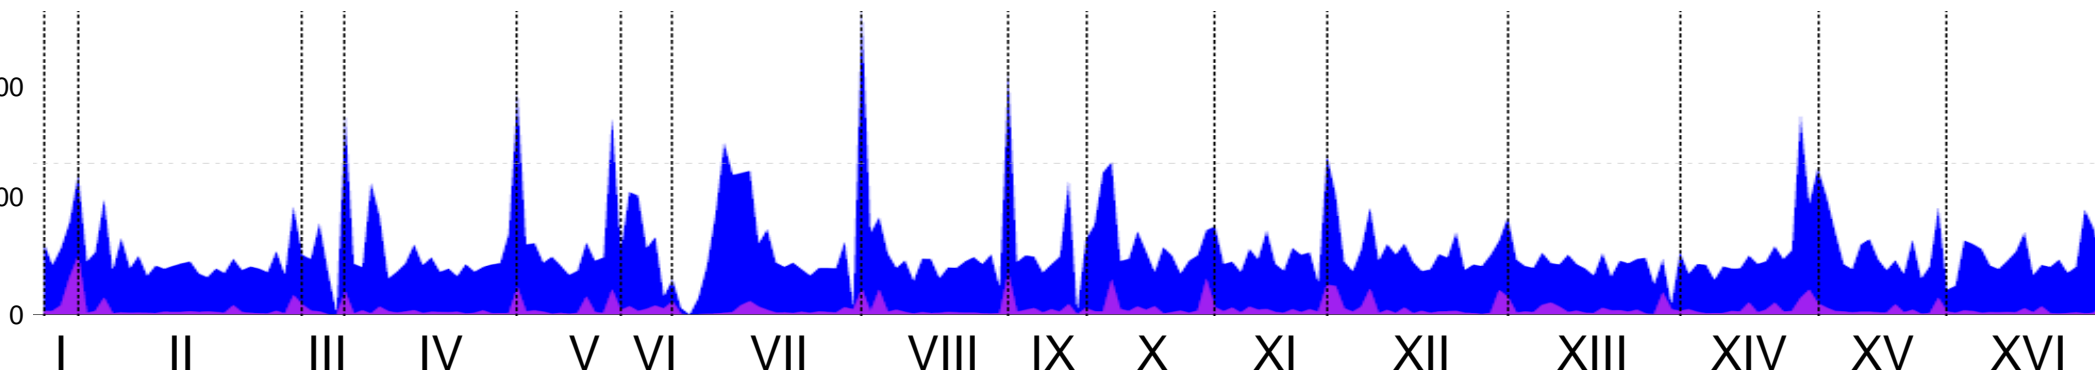**■ Homozygous SNPs**  
**■ Heterozygous SNPs**

**C**

# CDFM21L.1

● *S. eubayanus*

# of copies

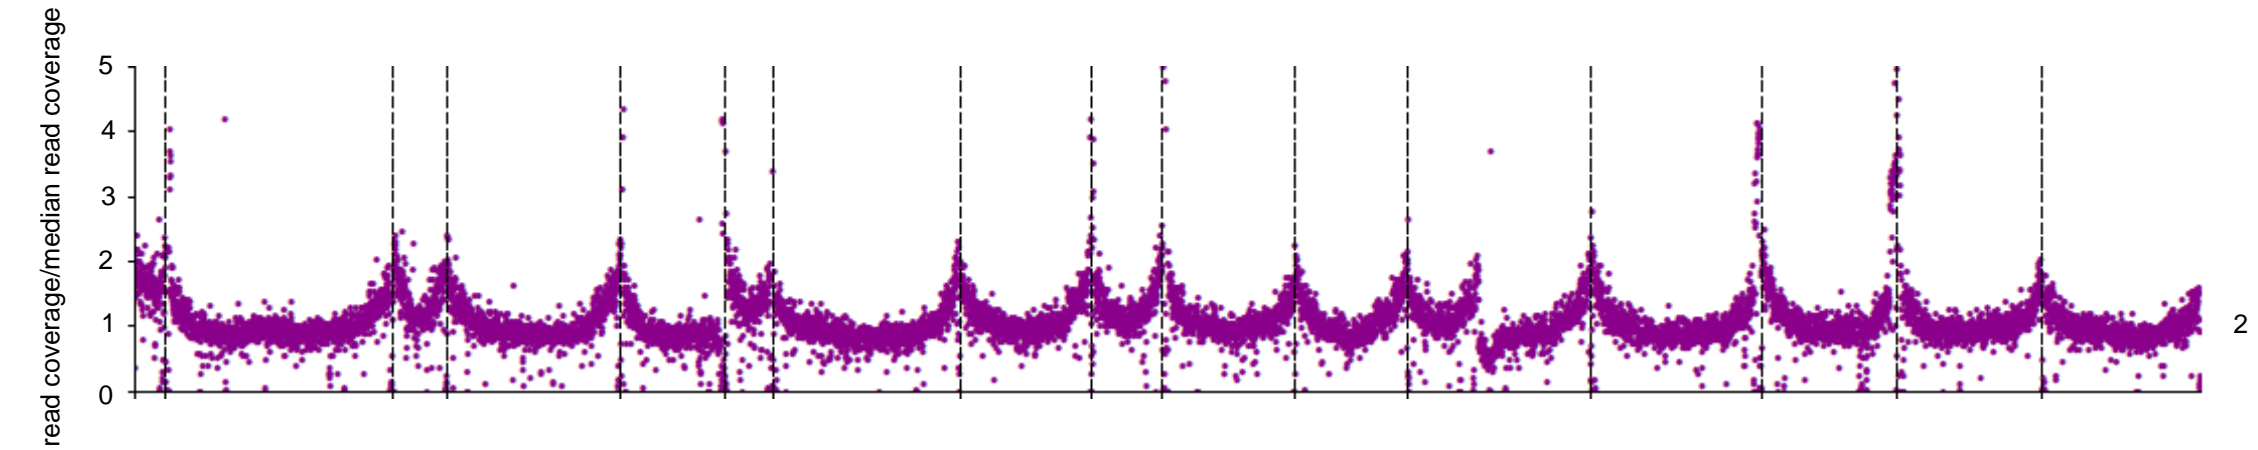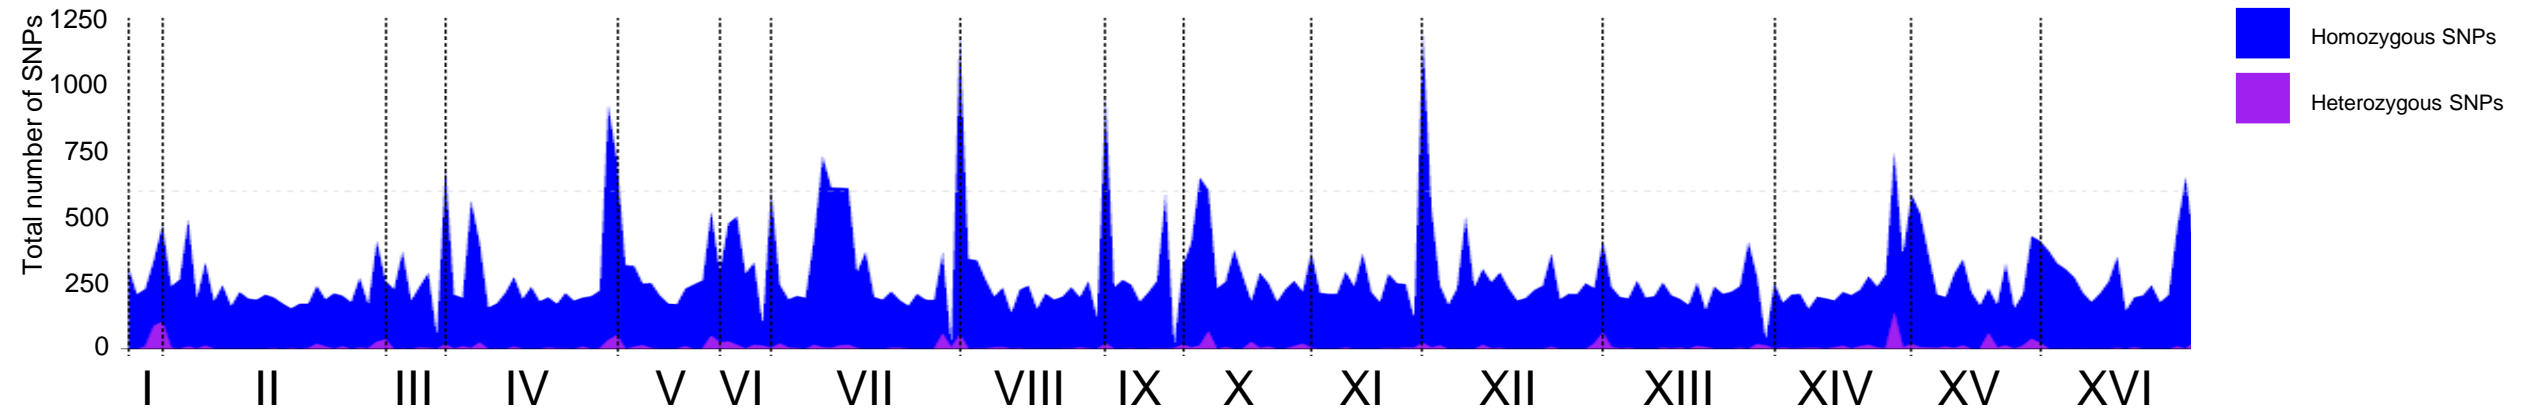

**D**

# yHRVM108

 *S. eubayanus*

# of copies

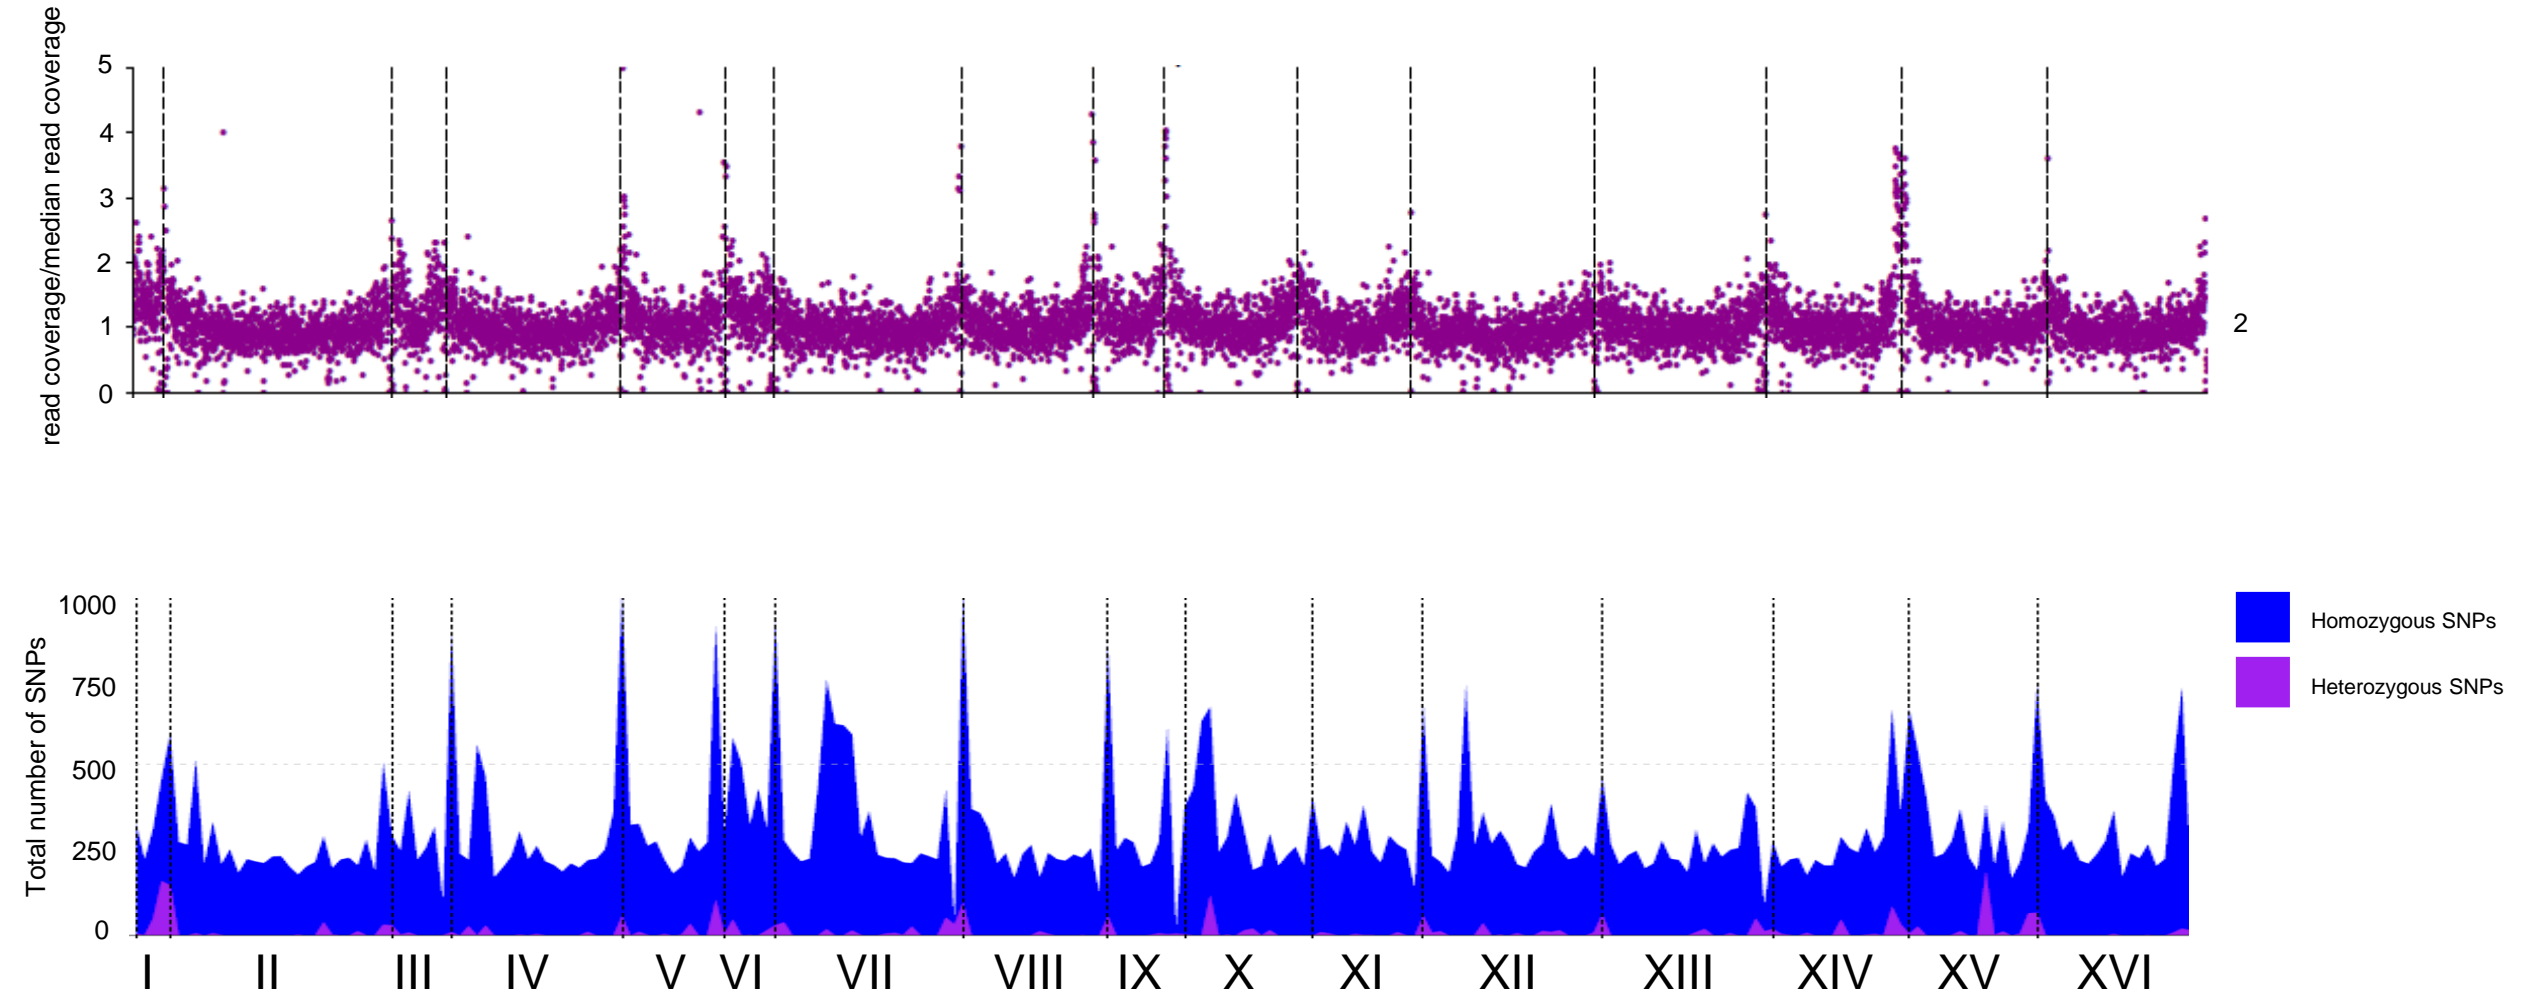

**E**

# yHCT61

● *S. eubayanus*

# of copies

2

■ Homozygous SNPs

■ Heterozygous SNPs

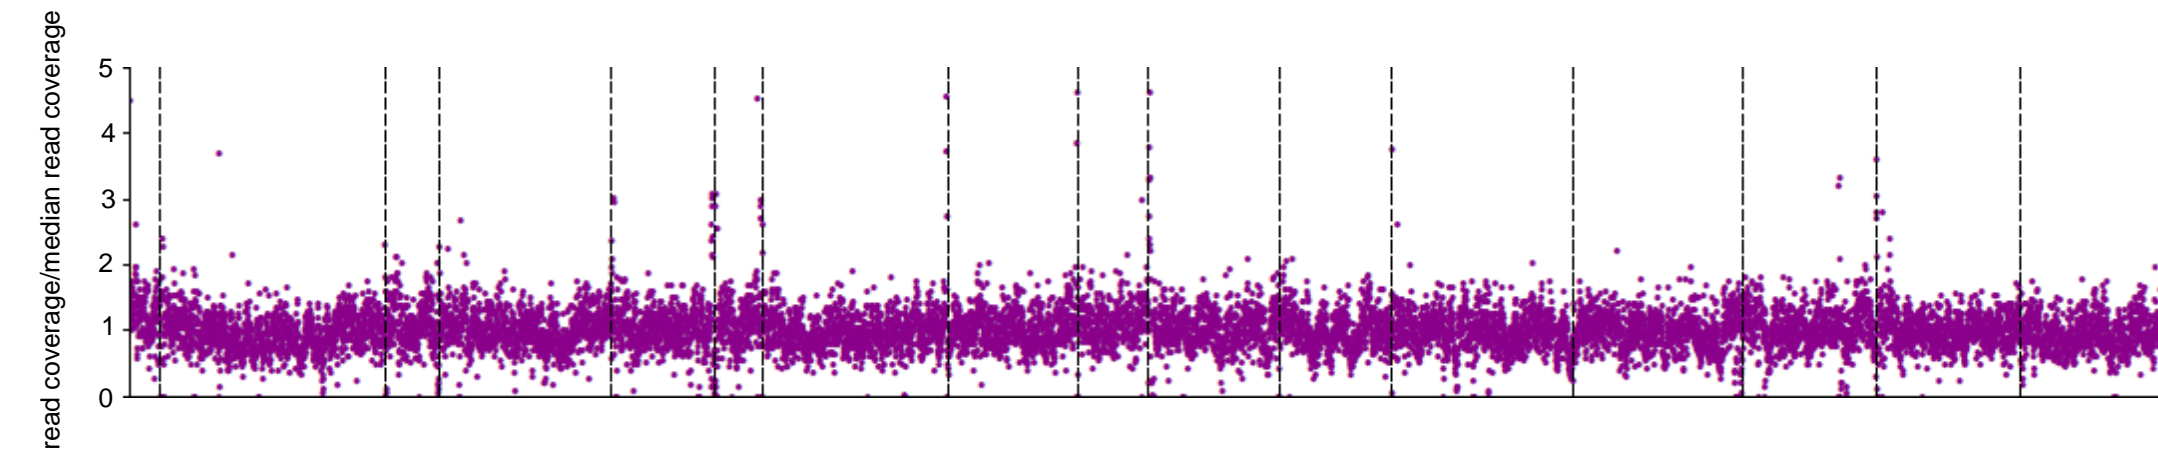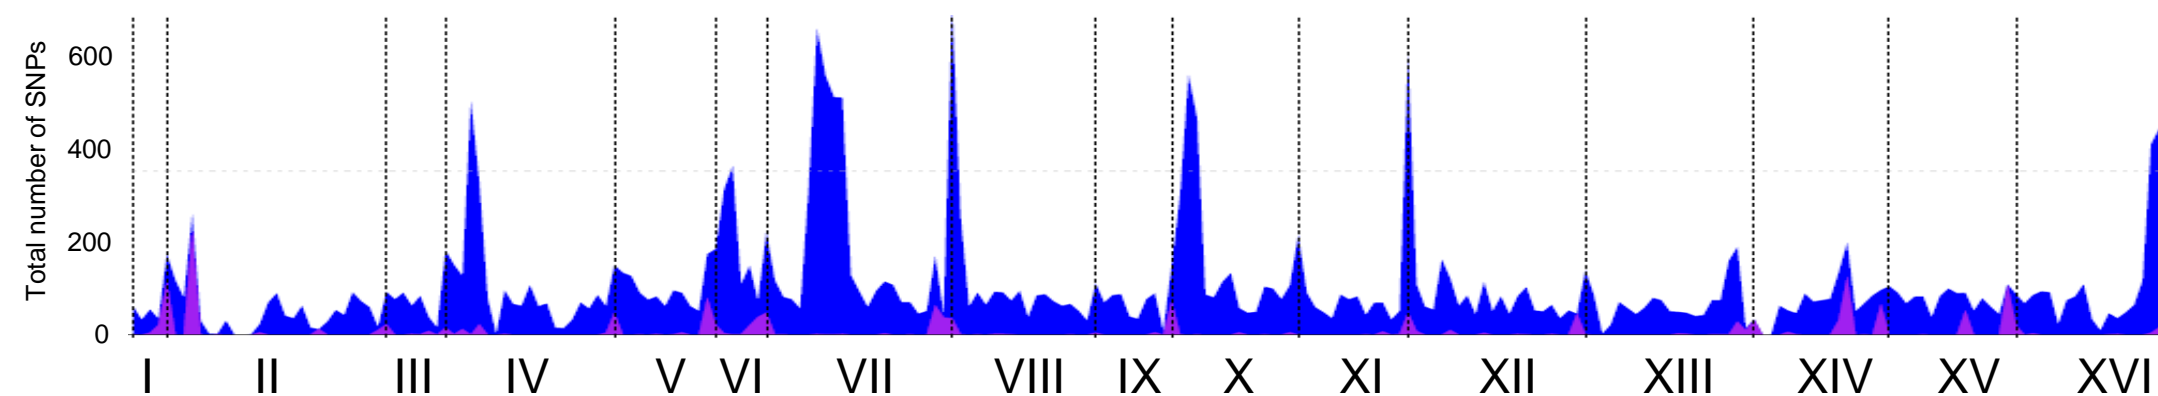

F

## yHCT70

● *S. eubayanus*

# of copies

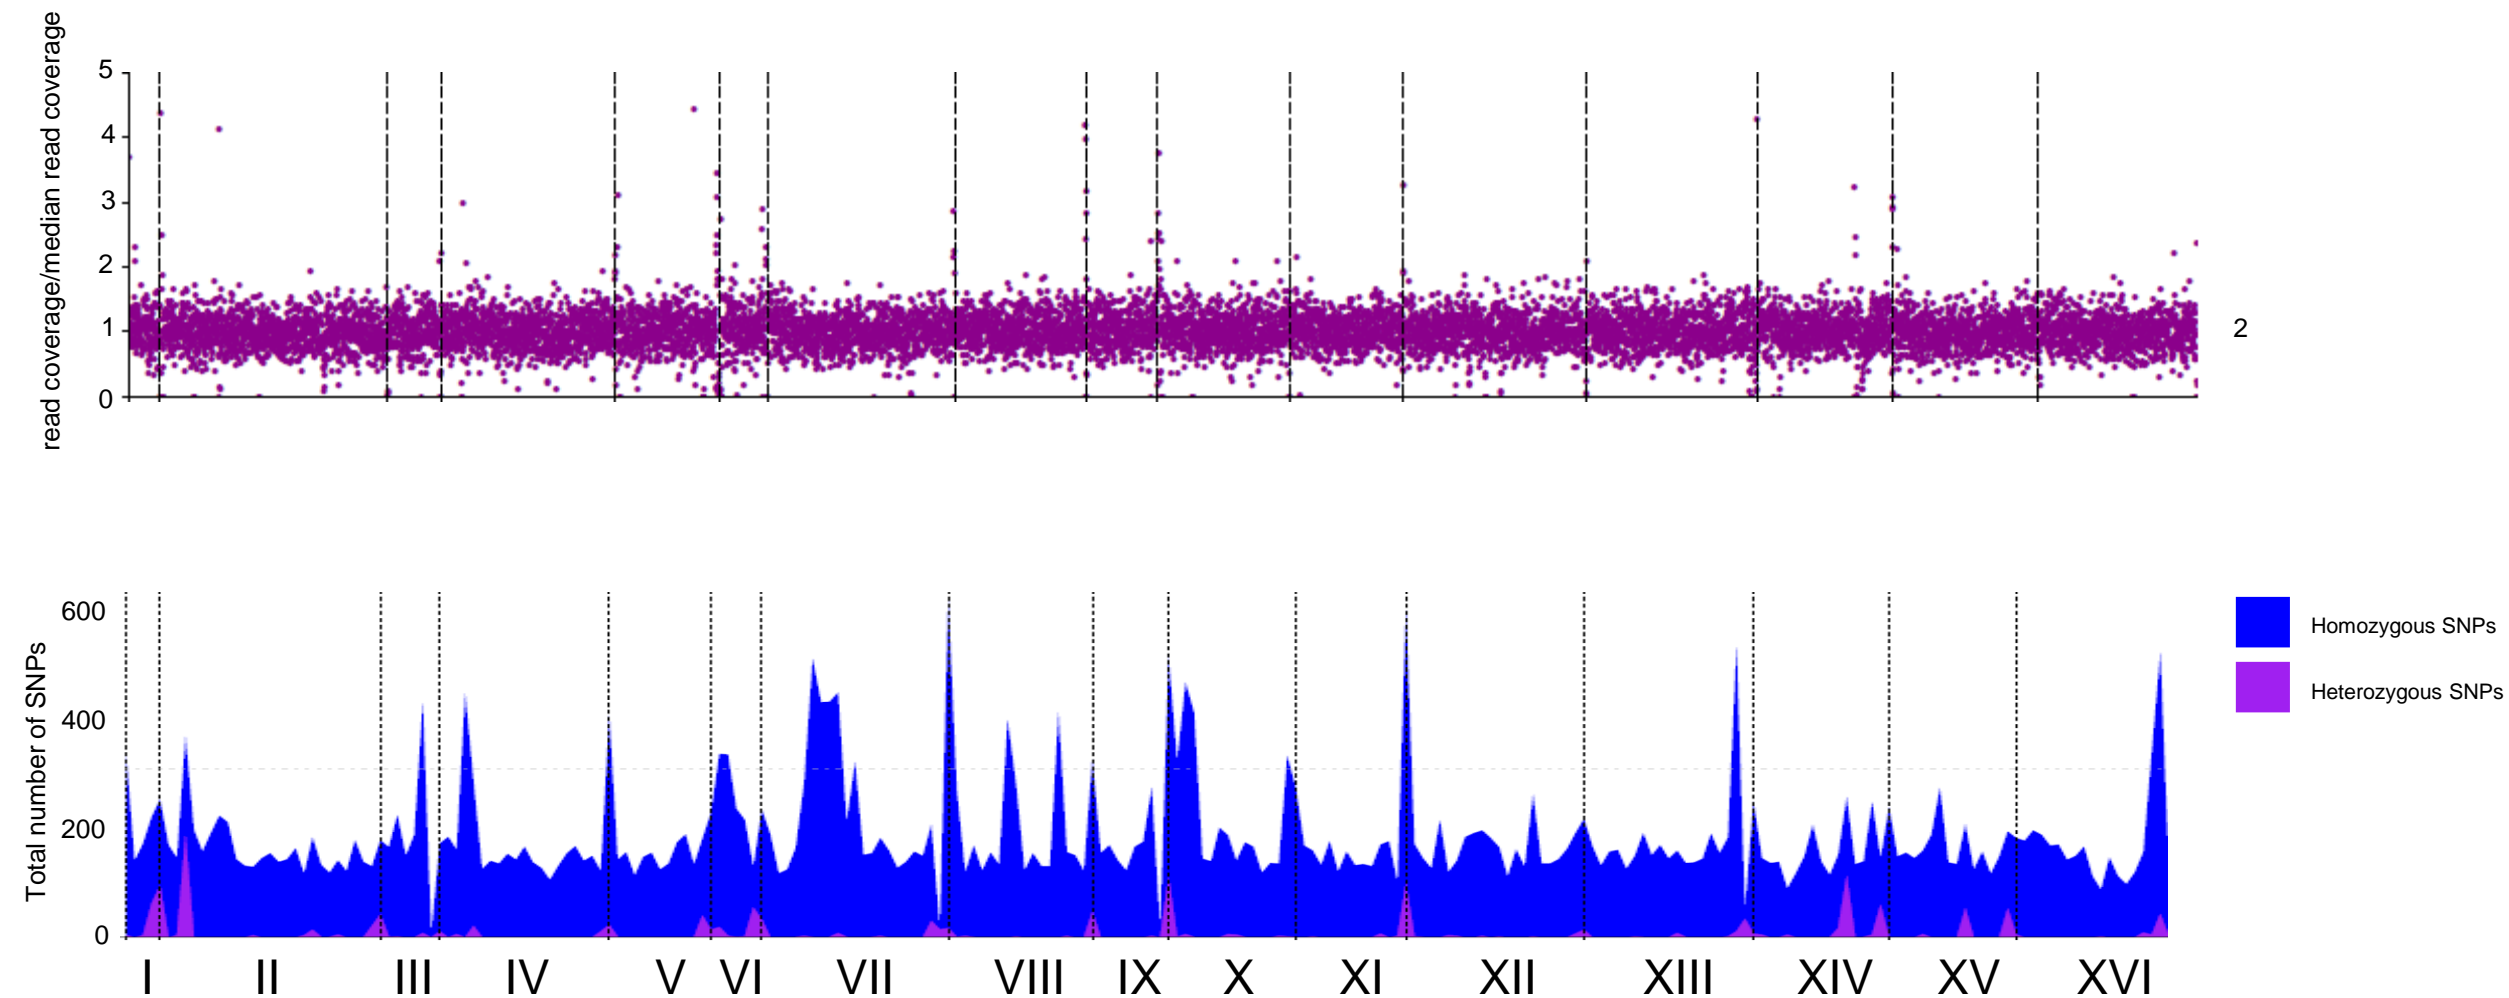

**G**

# yHCT96

● *S. eubayanus*

# of copies

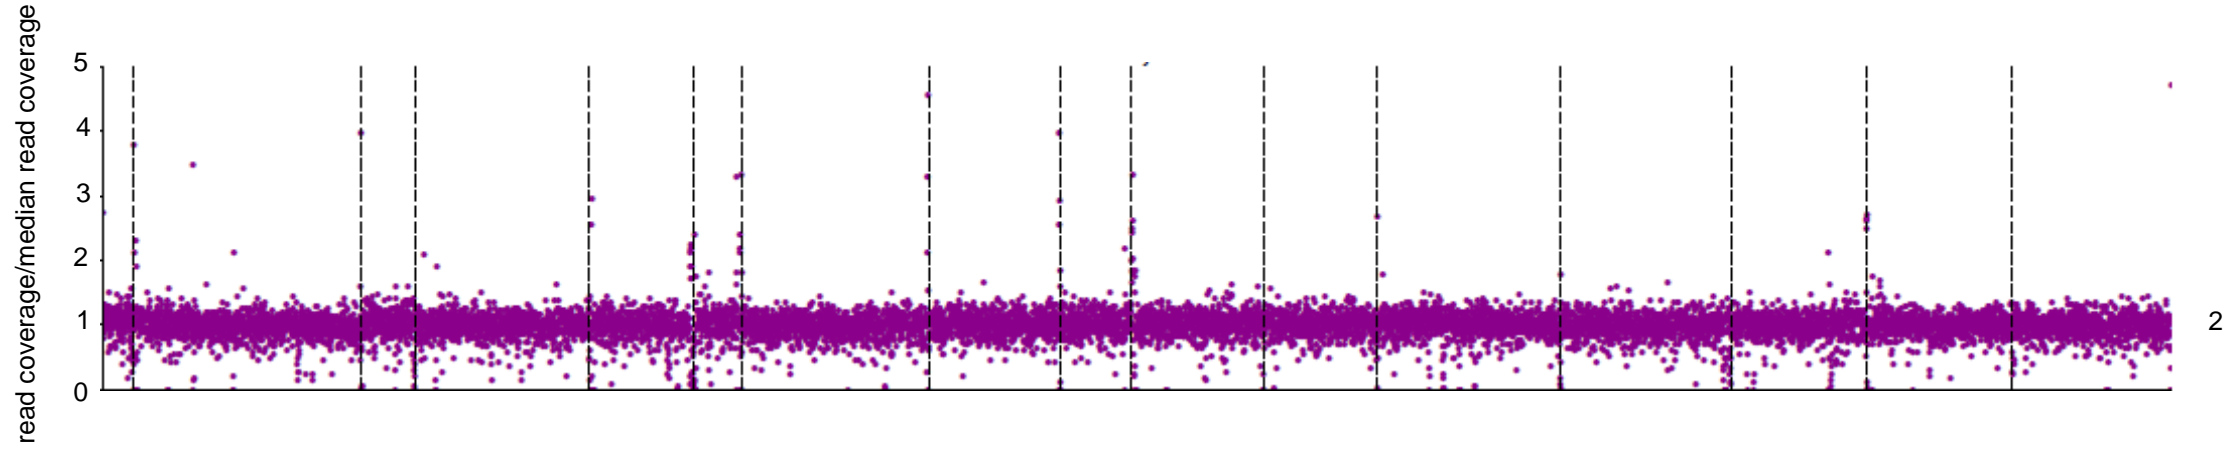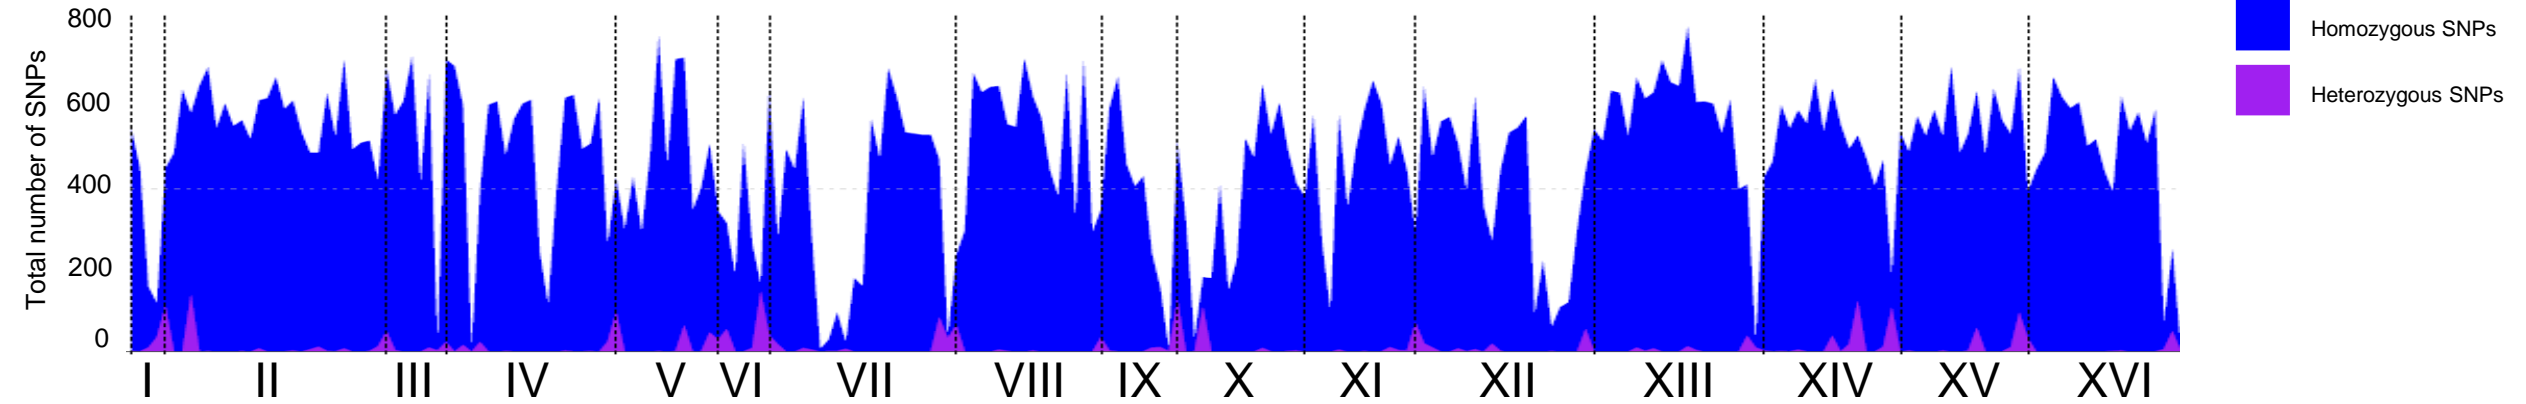

# H

## yHCT114

● *S. eubayanus*

# of copies

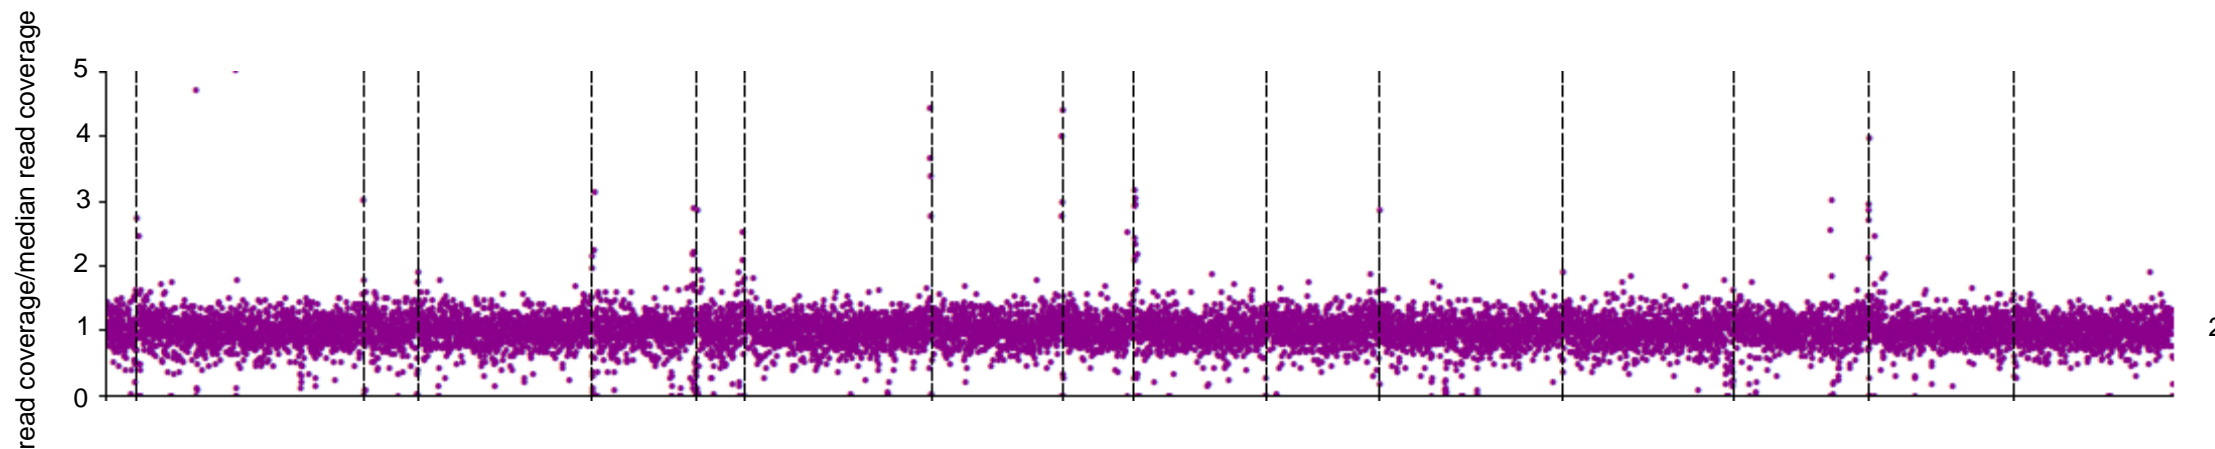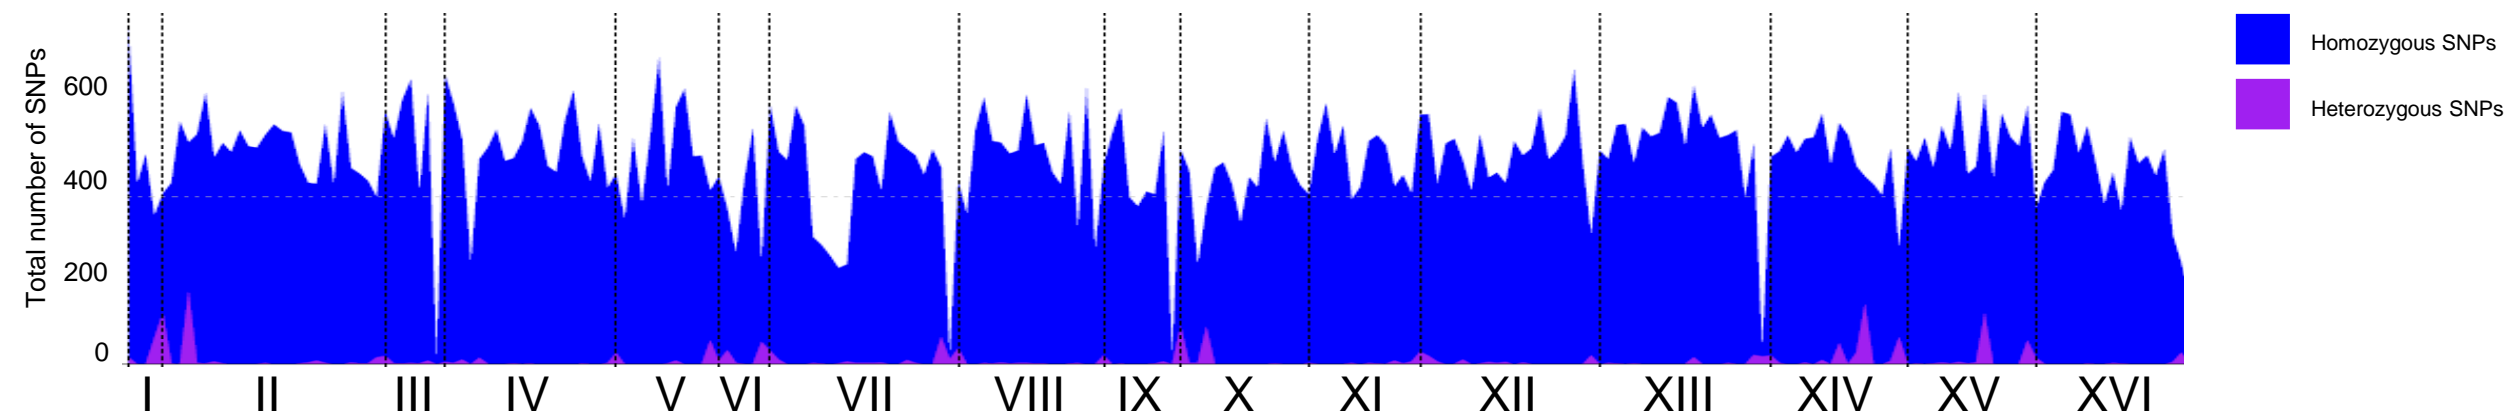



# yHKS212

 *S. eubayanus*

# of copies

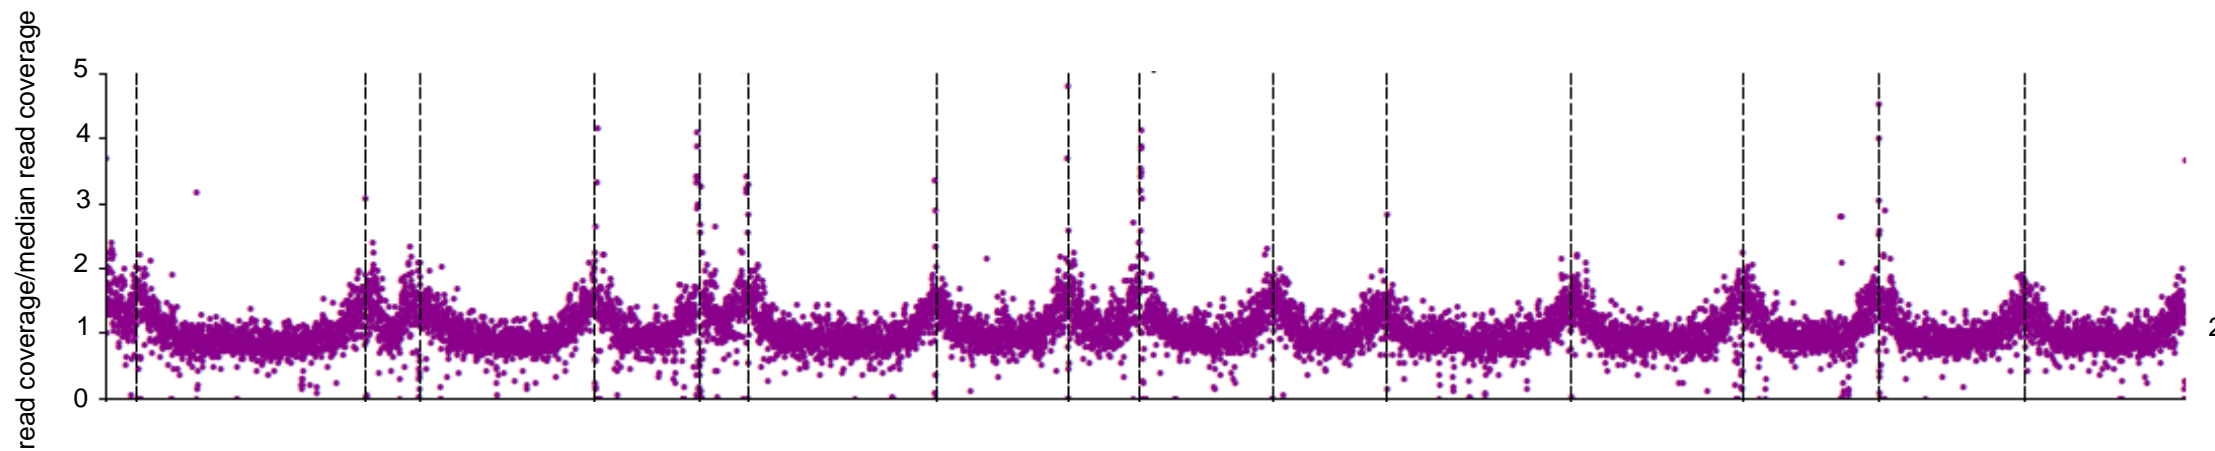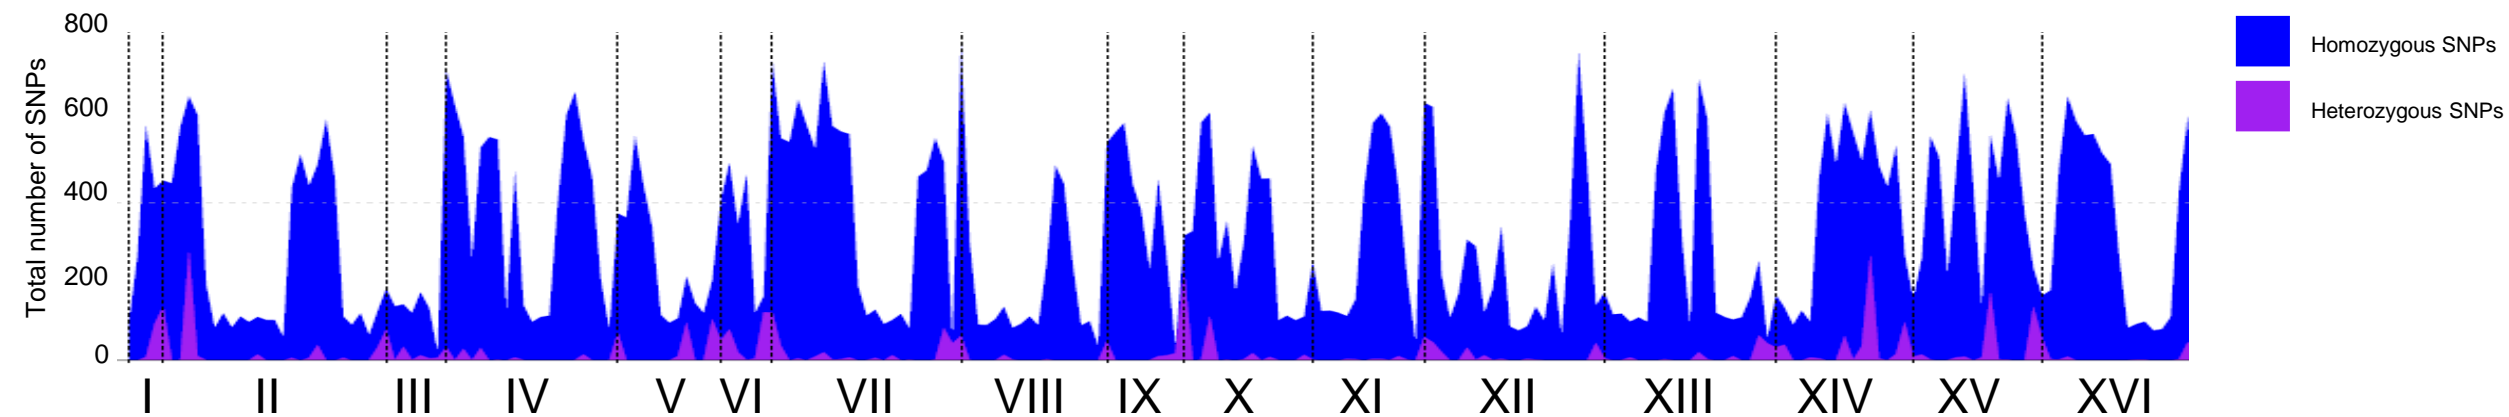

**J**

# FM1318

● *S. eubayanus*  
# of copies

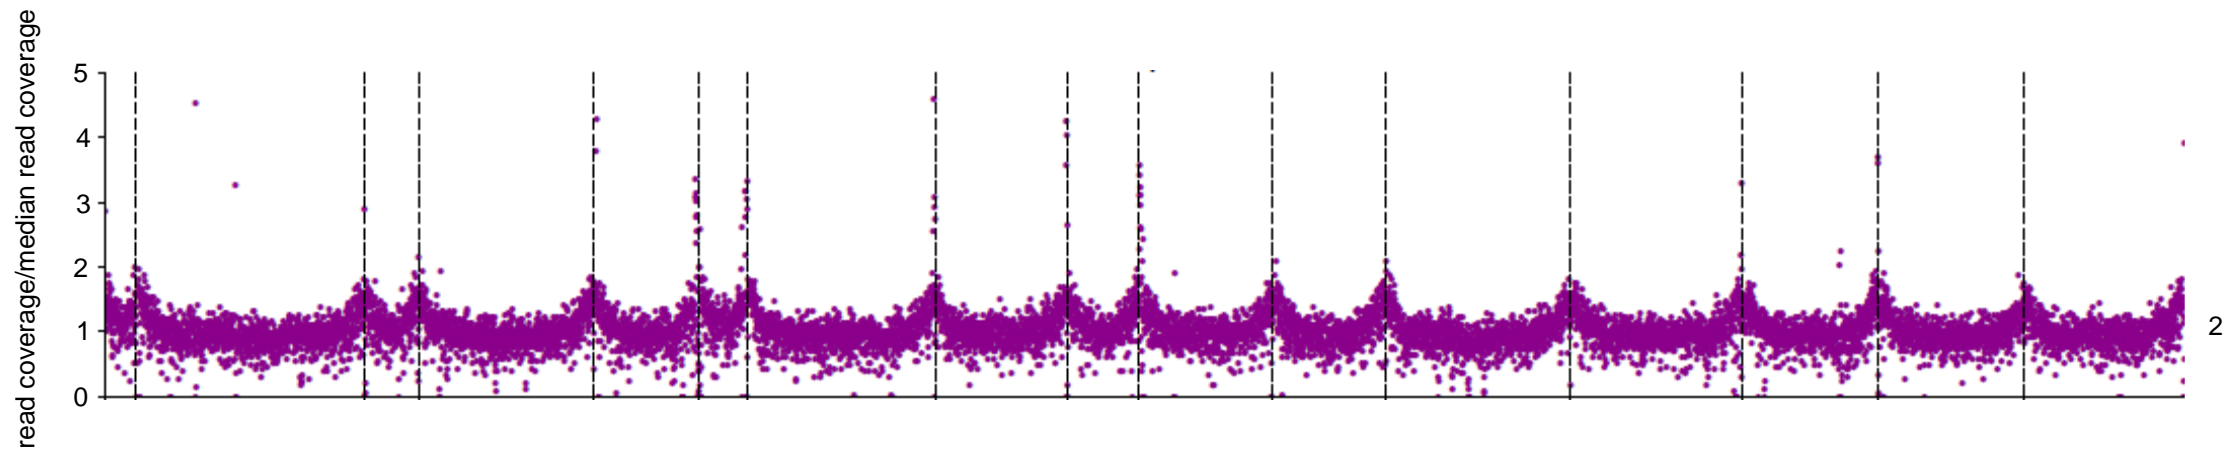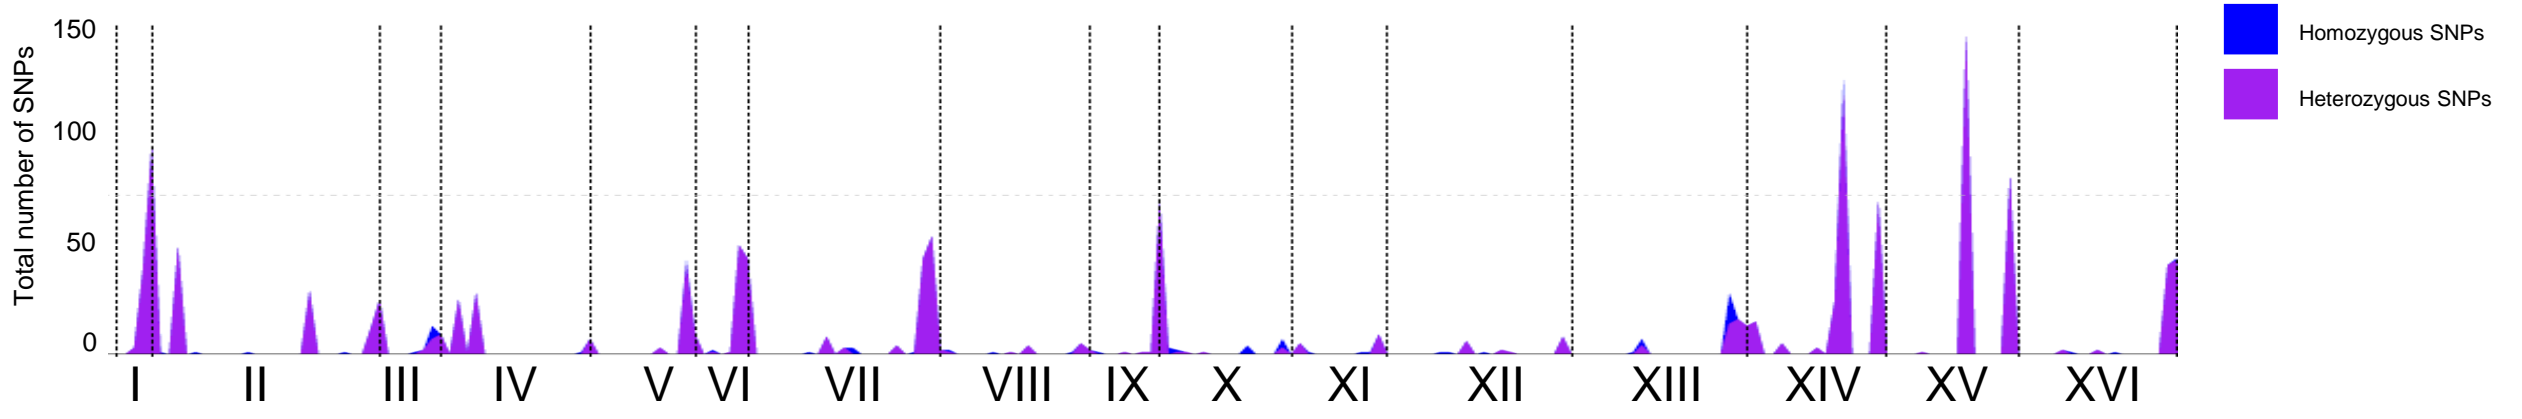

Supplement: pgen.1006155.s016.pdf [file pgen.1006155.s016.pdf]
