# Supplementary material for: Complex Ancestries of Lager-Brewing Hybrids Were Shaped by Standing Variation in the Wild Yeast Saccharomyces eubayanus
Source: PubMed Central journal article supplement (PMC4934787; doi:10.1371/journal.pgen.1006155), 2016-07-06
Supplement: pgen.1006155.s010.pdf [file pgen.1006155.s010.pdf]

# A CCA1

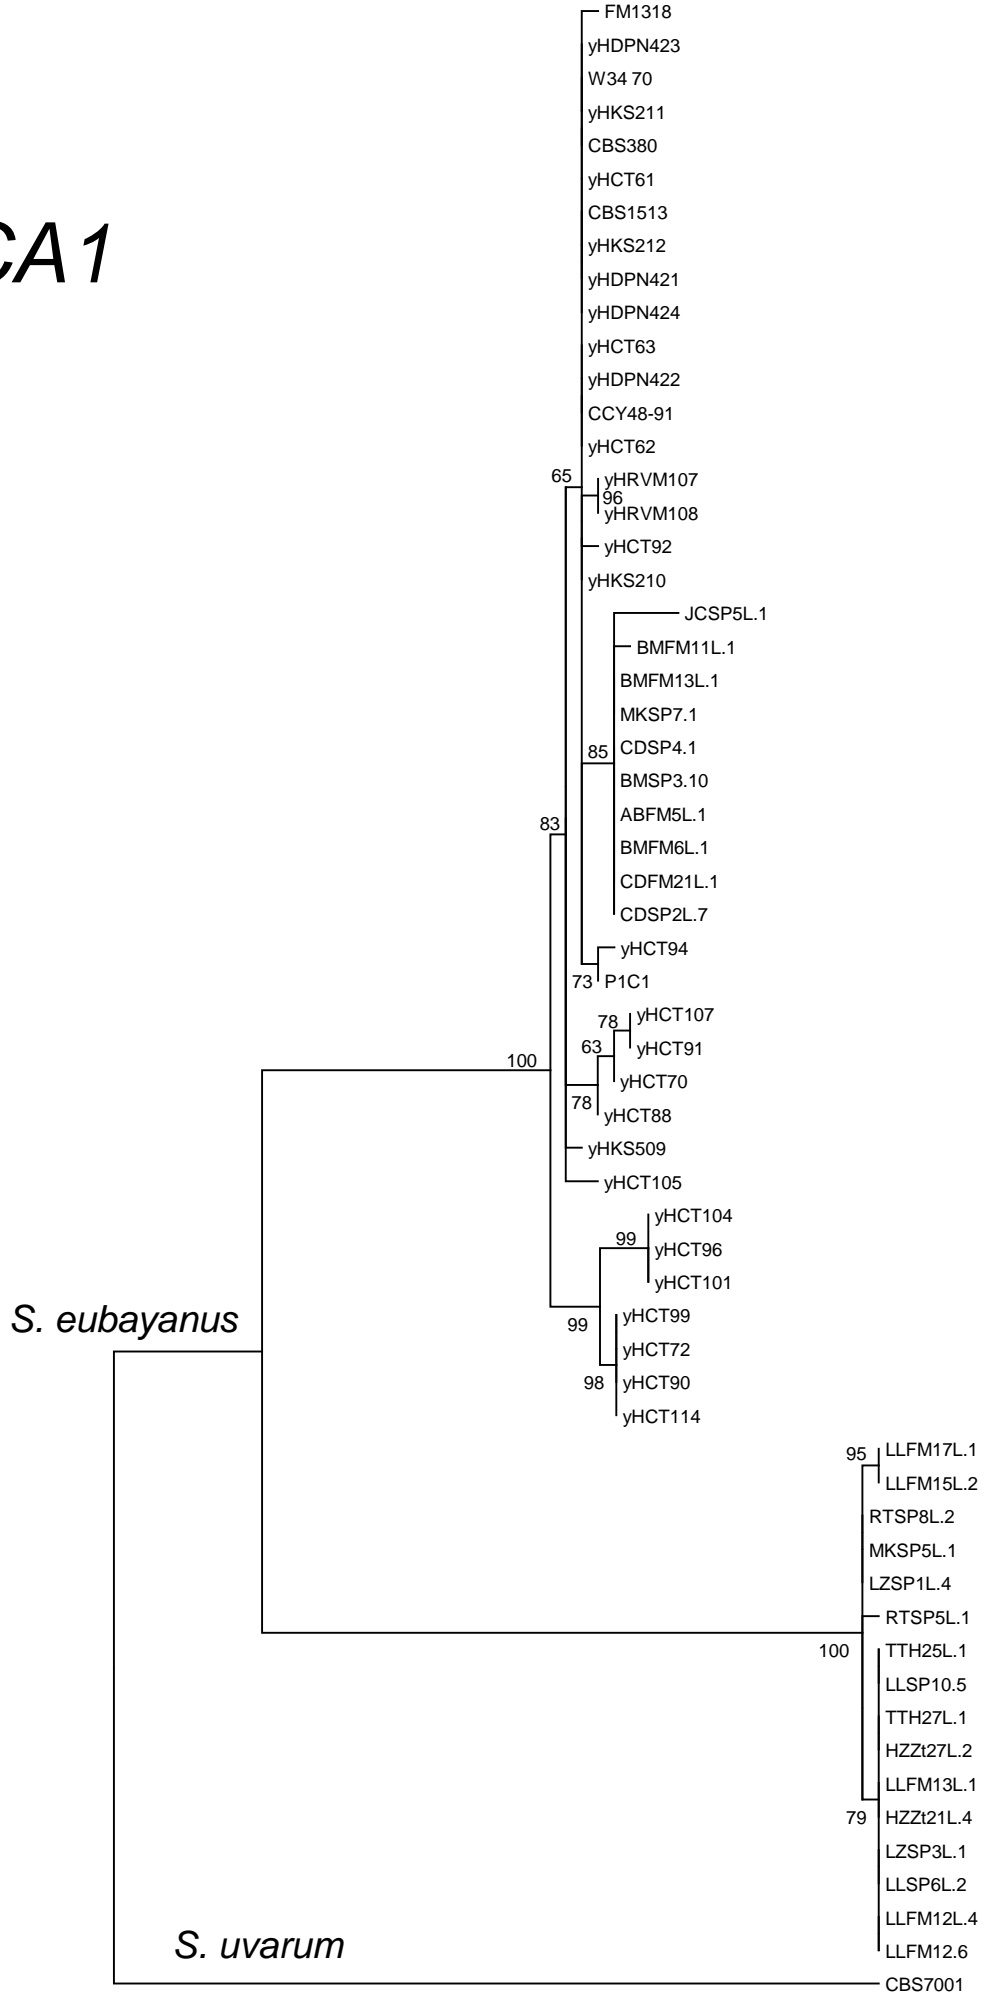

0.01

# B *FSY1*

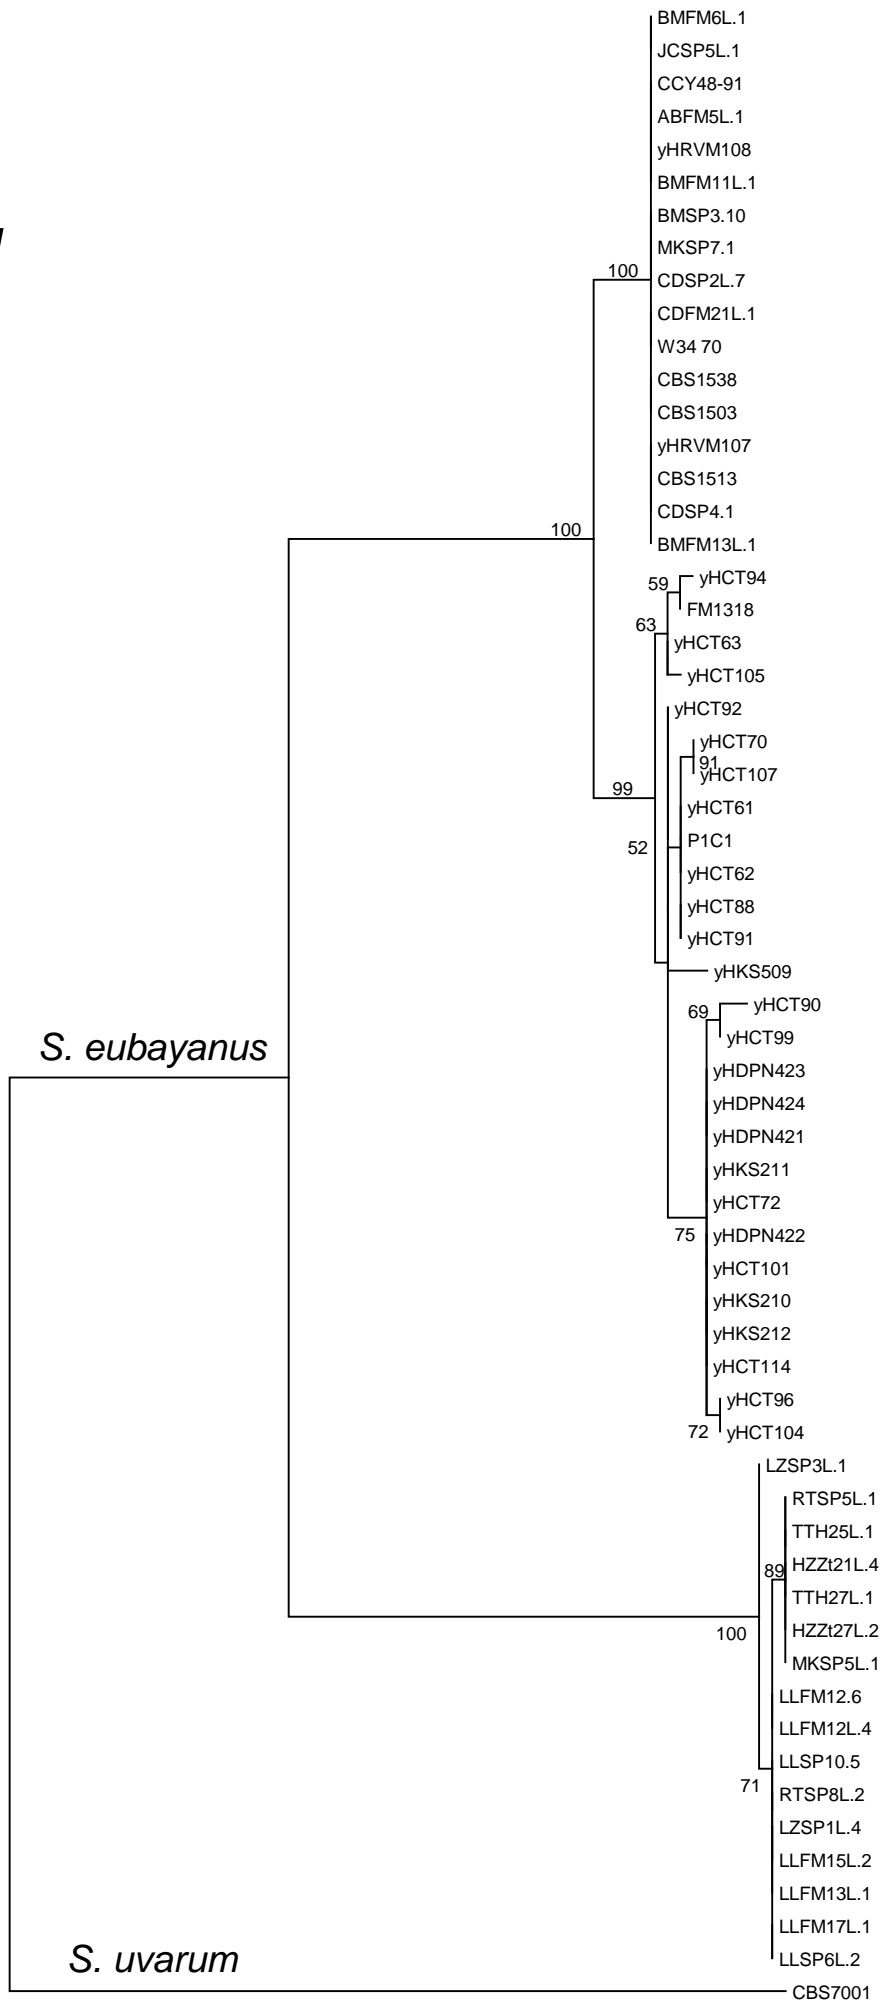

0.01

# C *FUN14*

*S. eubayanus*

*S. uvarum*

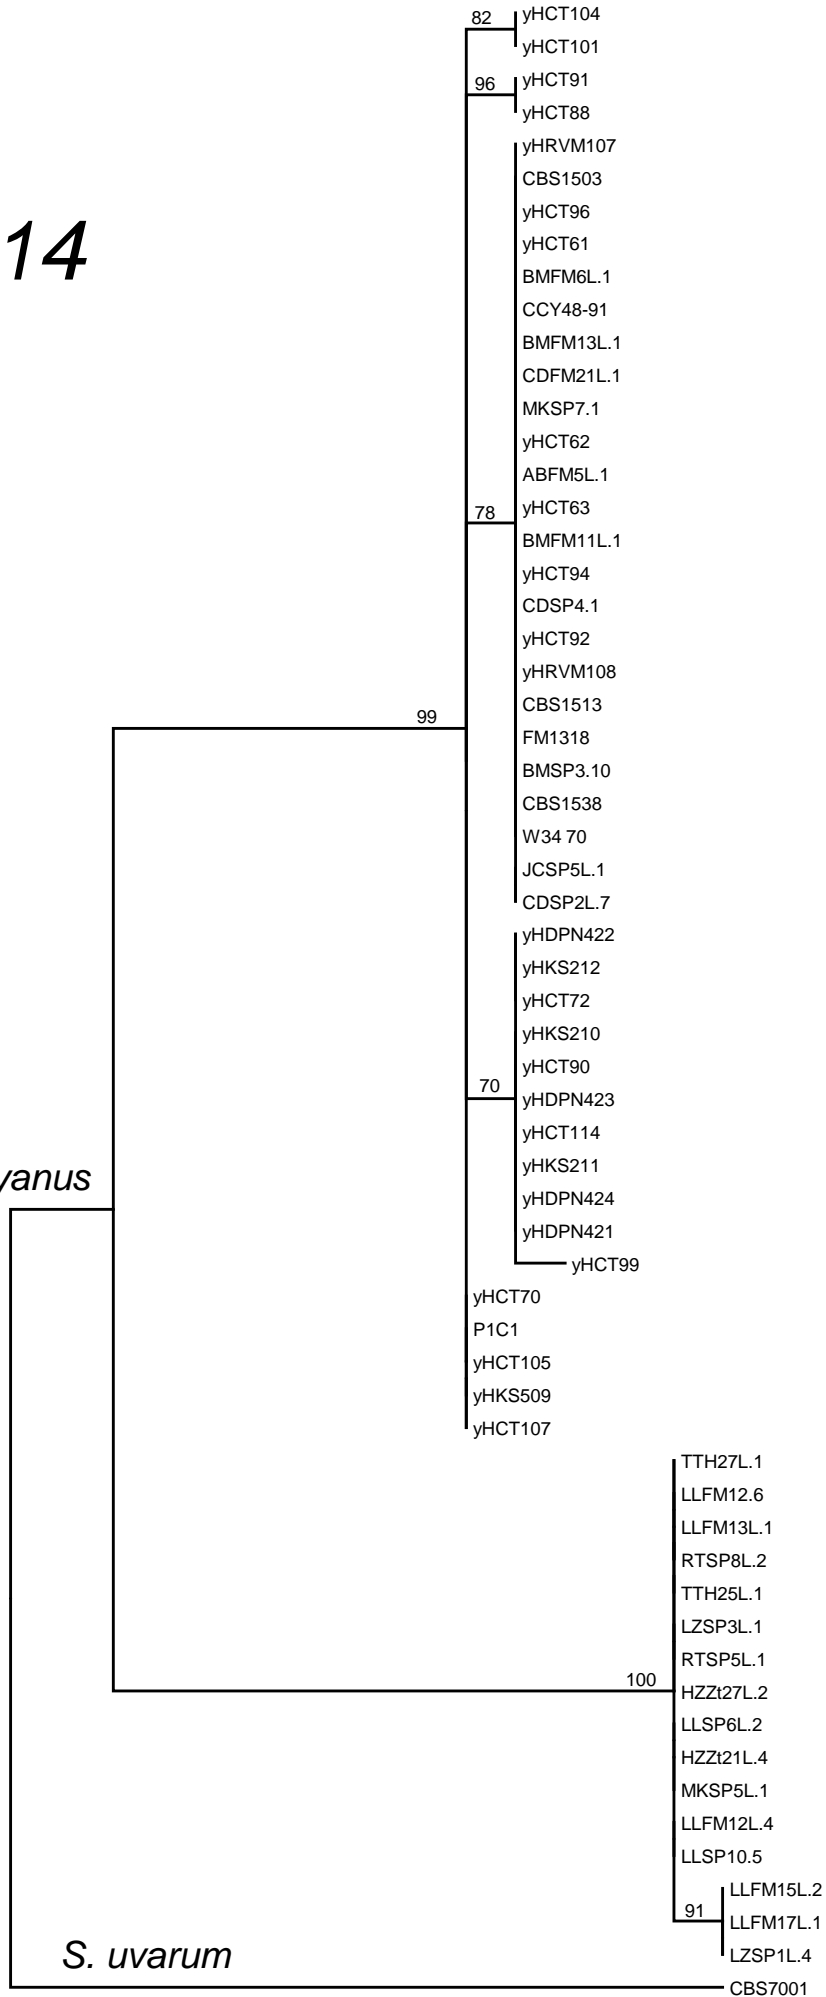

# D *GDH1*

*S. eubayanus*

*S. uvarum*

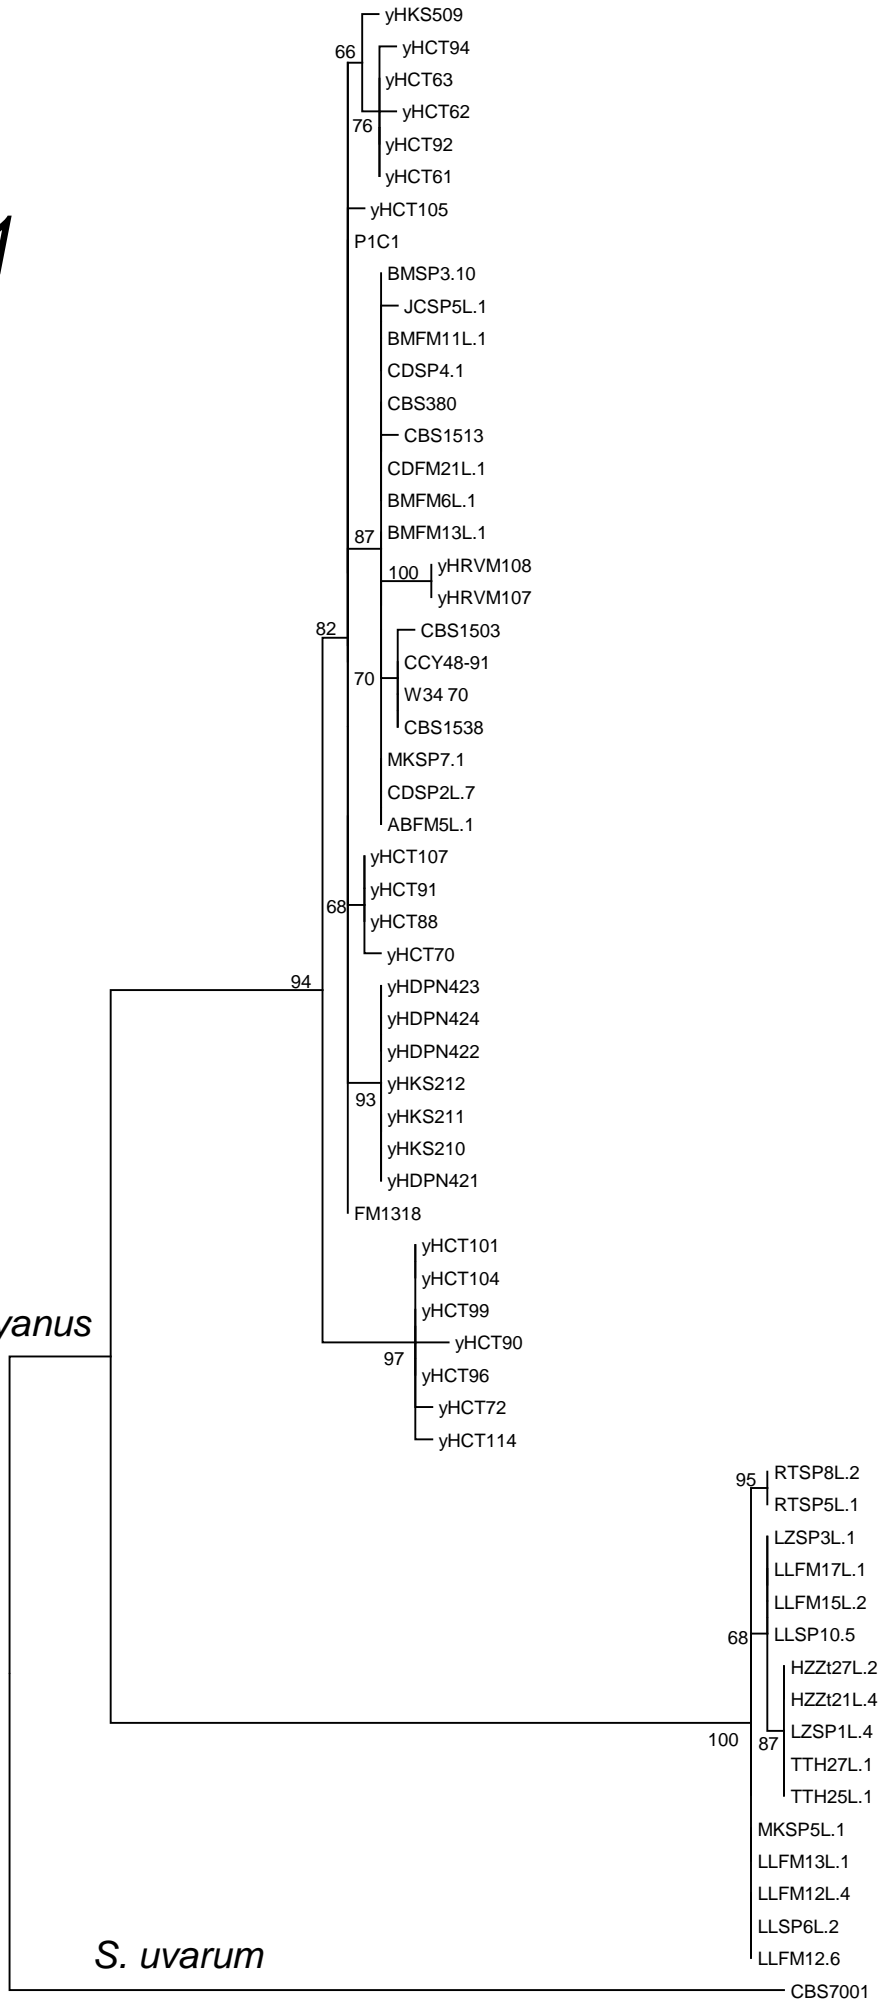

0.01

# E *HIS3*

*S. eubayanus*

*S. uvarum*

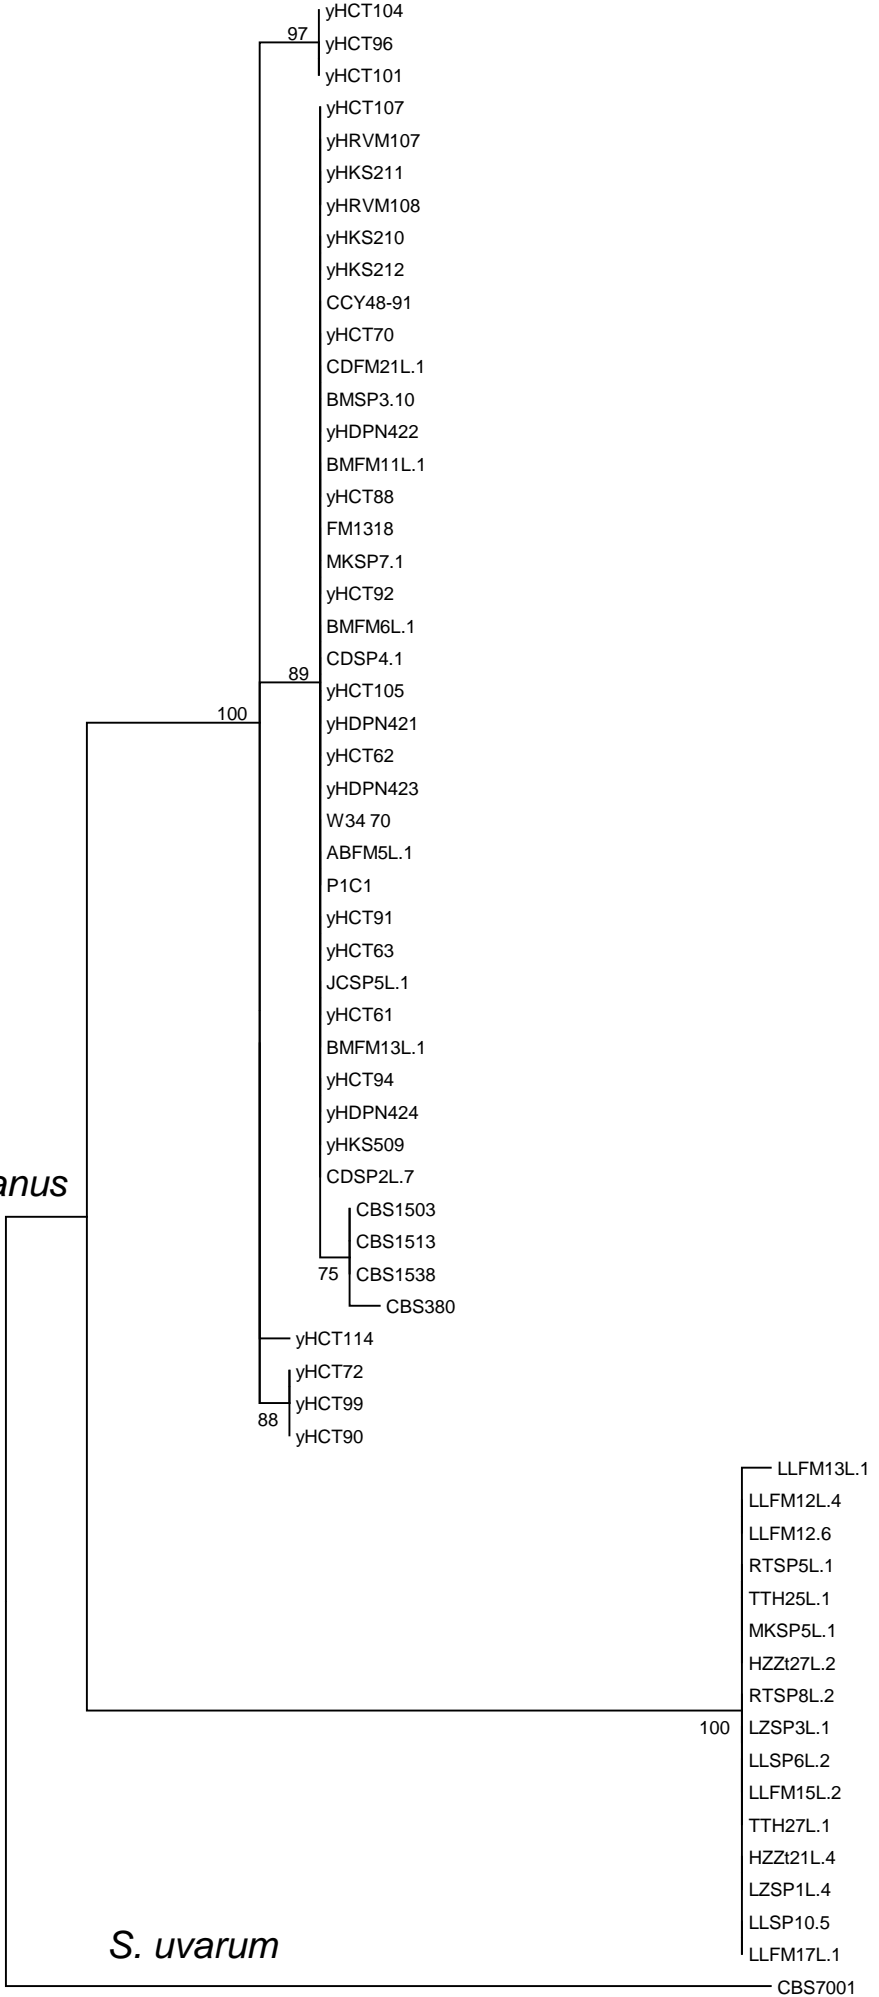

0.01

# F *IntAY*

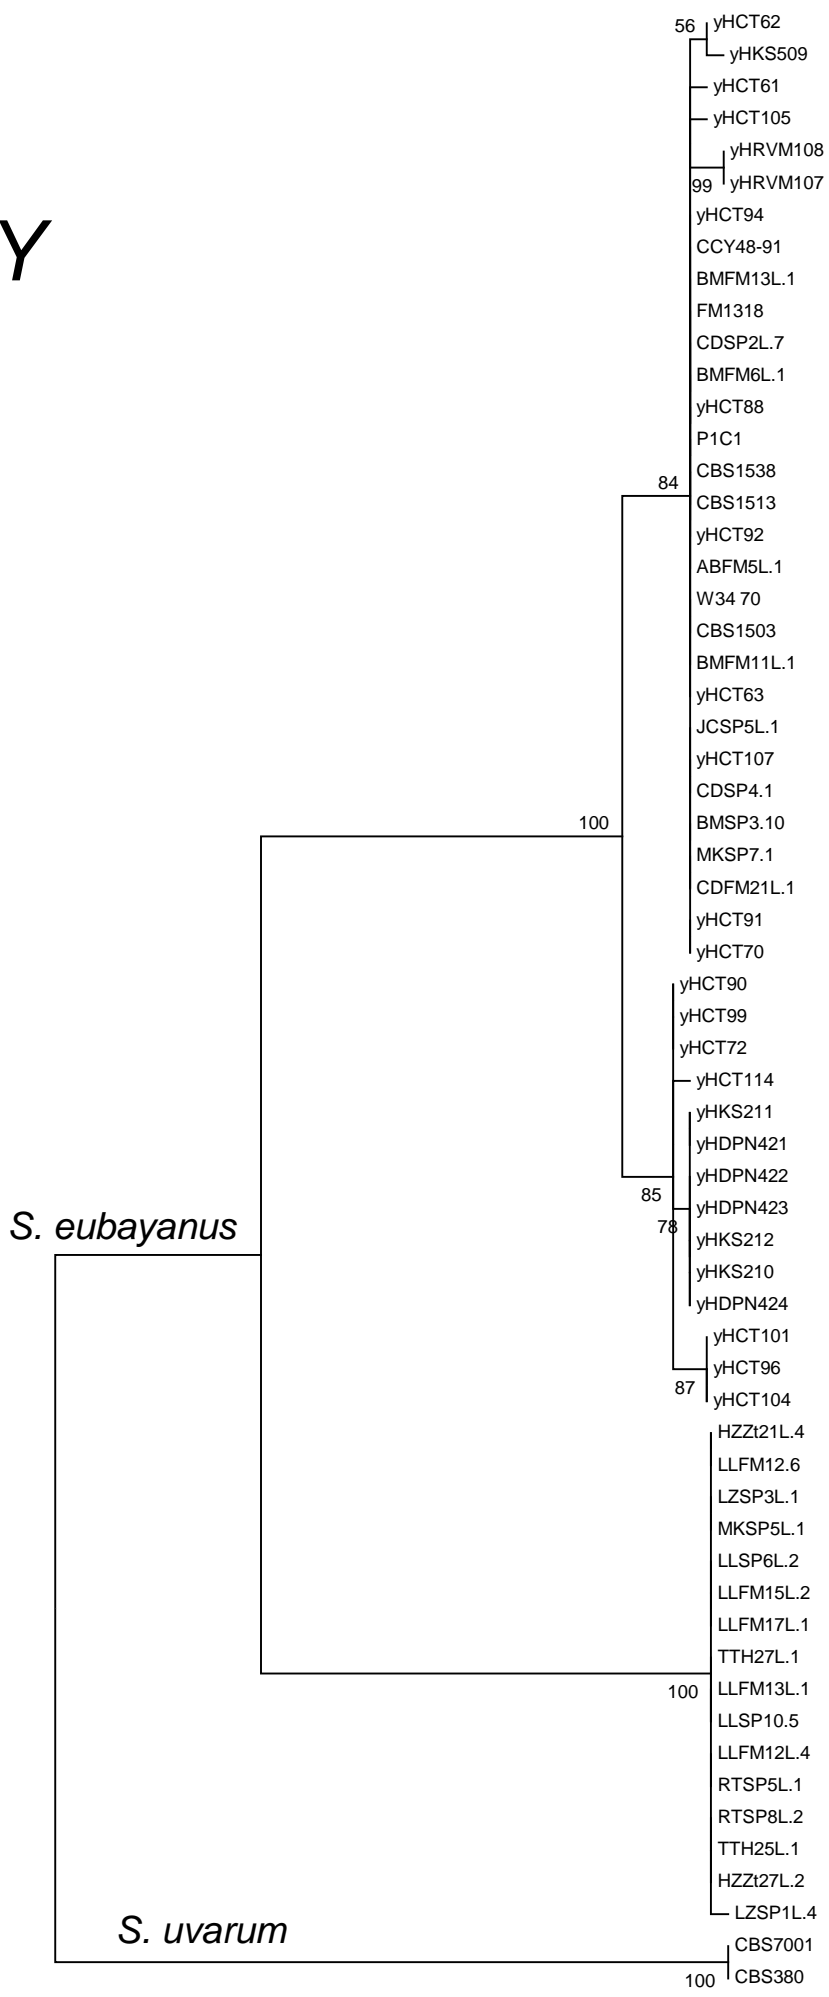

0.01

# G *IntFR*

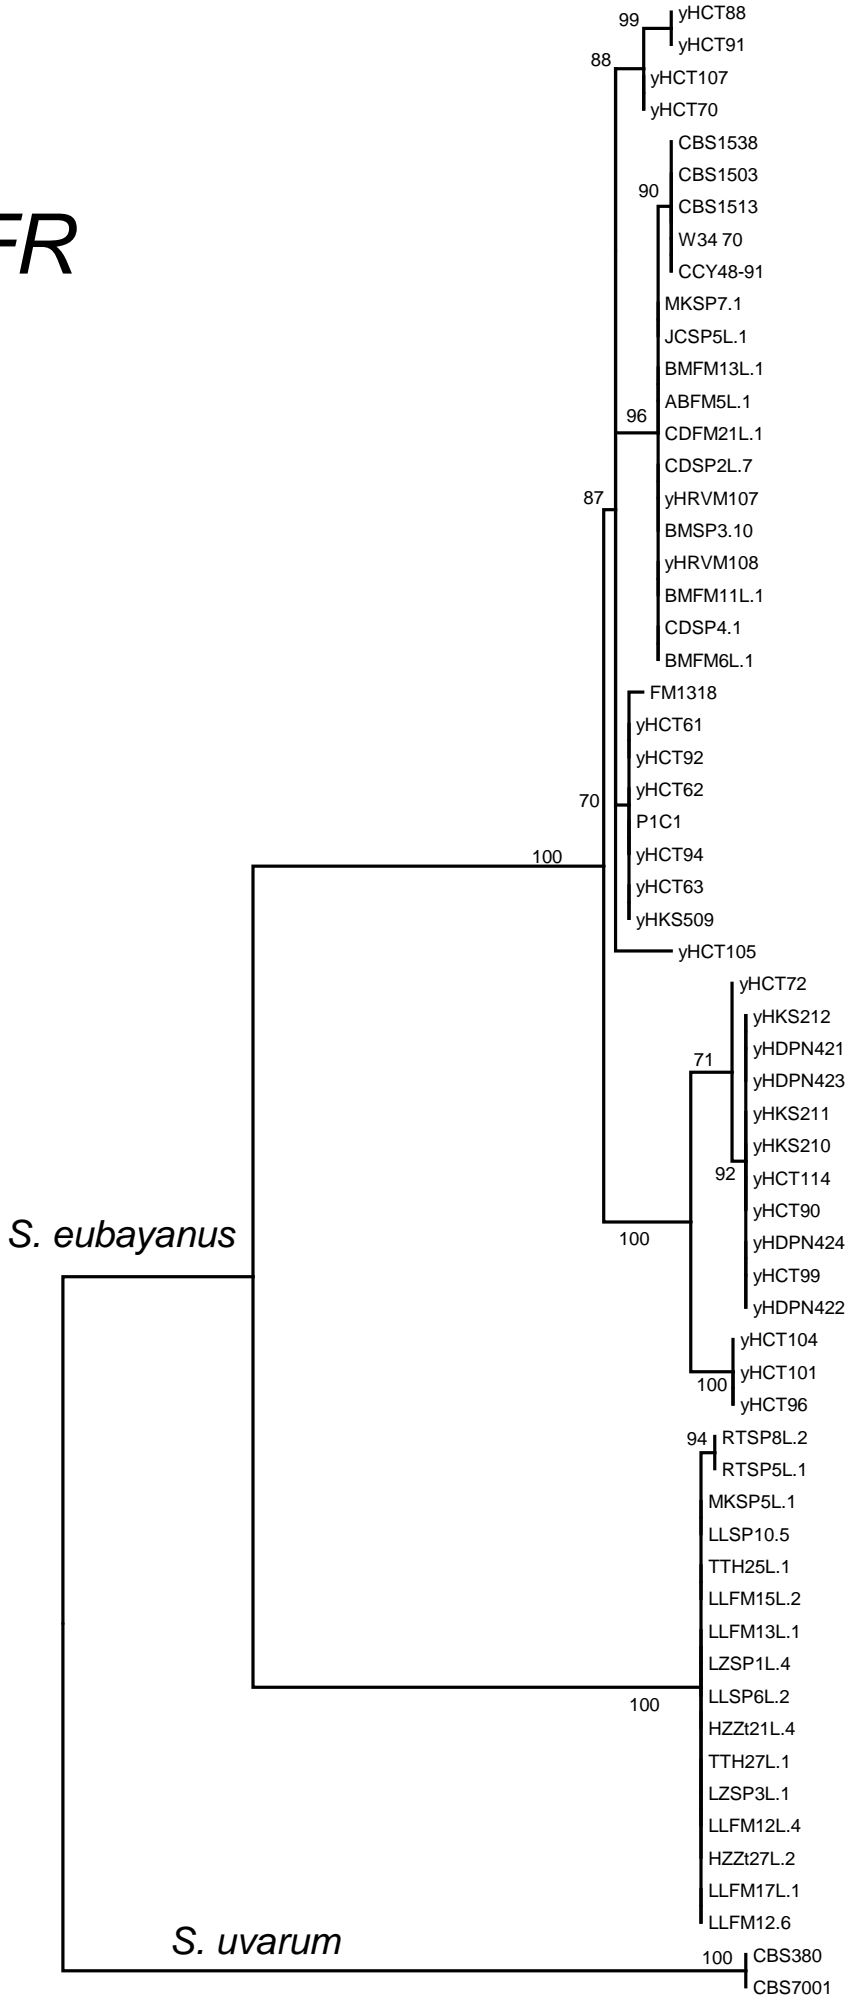

0.01

# H *IntMD*

*S. eubayanus*

*S. uvarum*

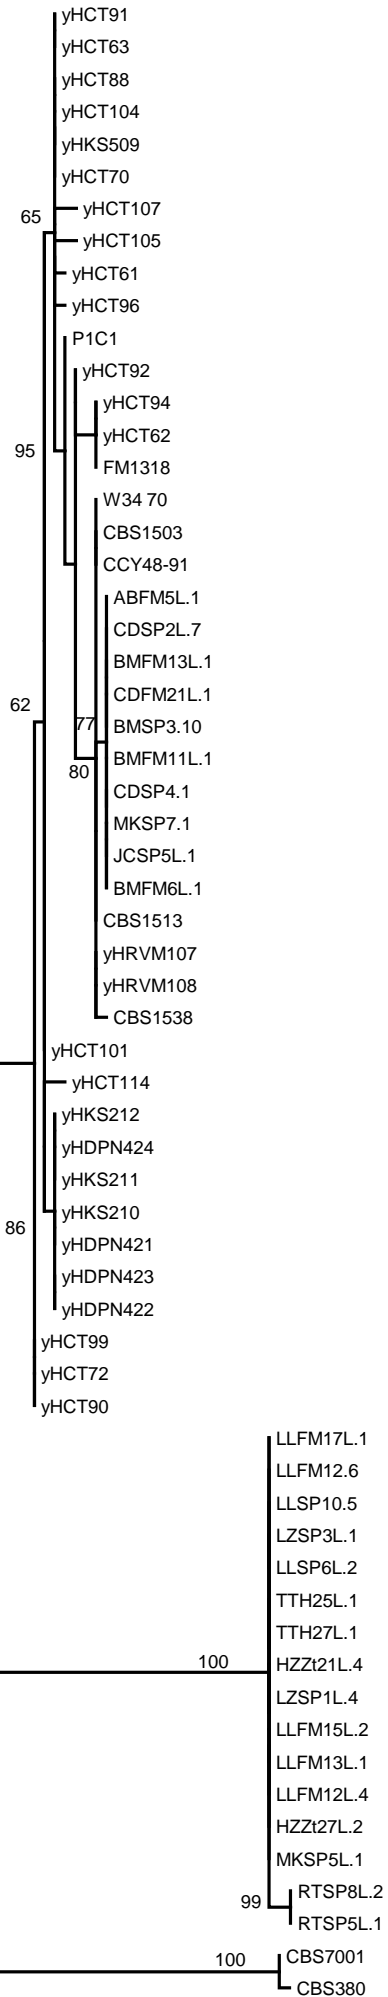

0.01



# MET2

*S. eubayanus*

*S. uvarum*

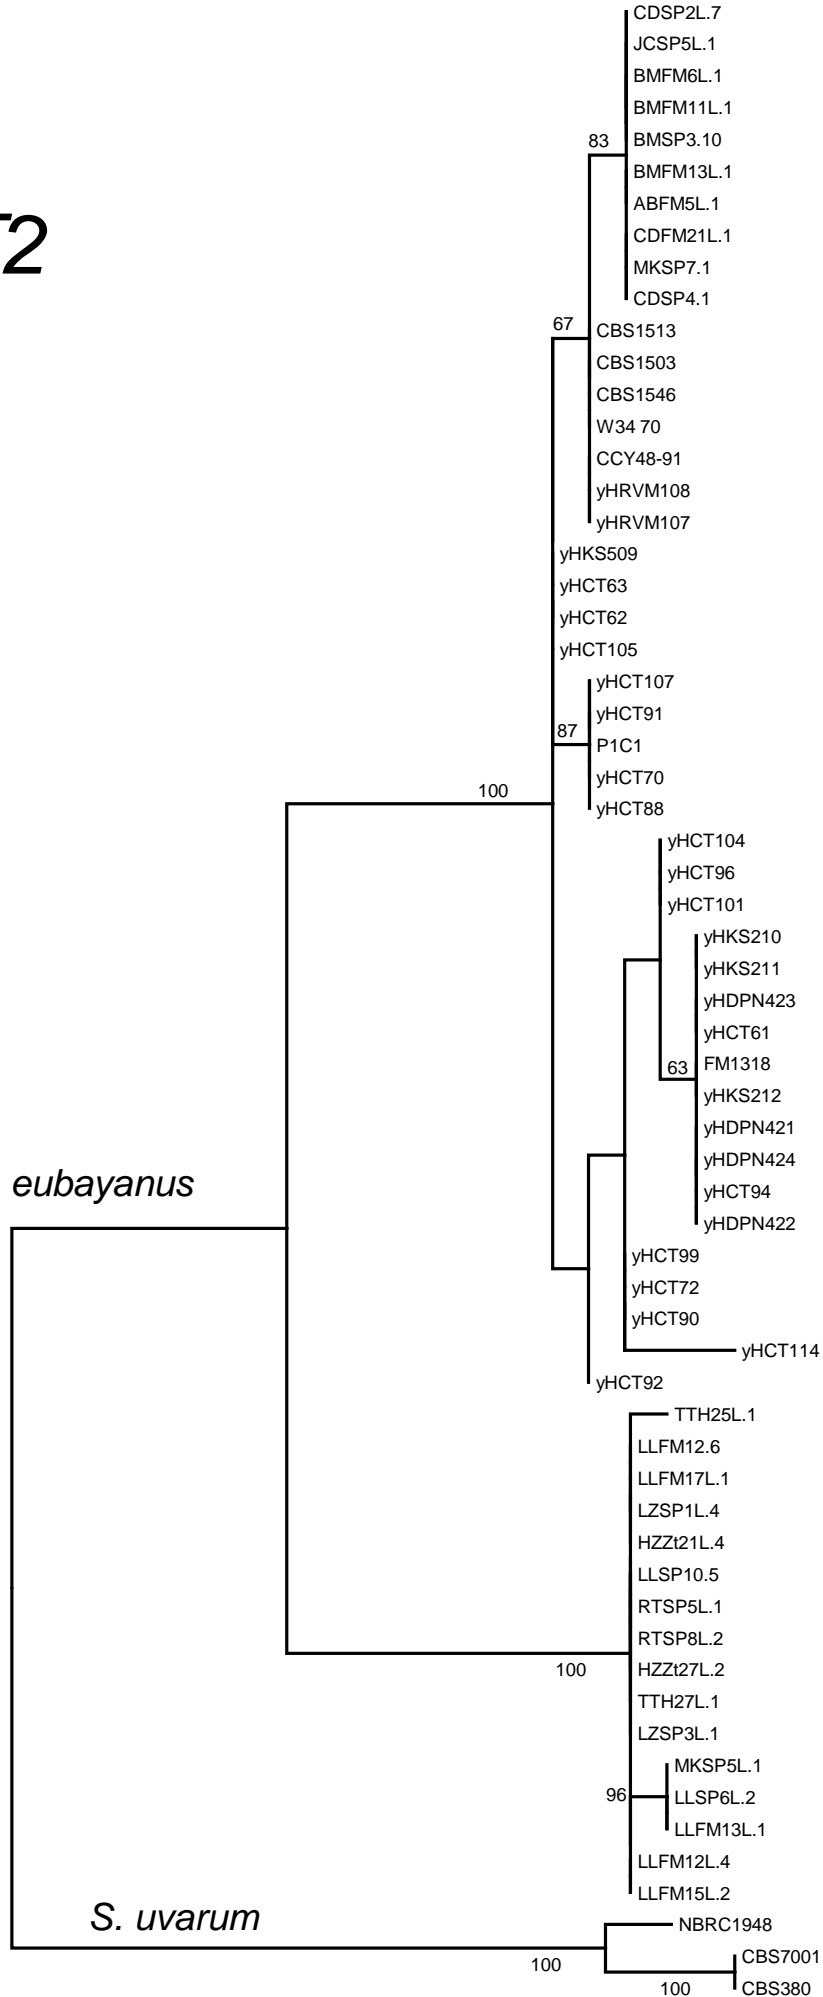

0.01

# J *MLS1*

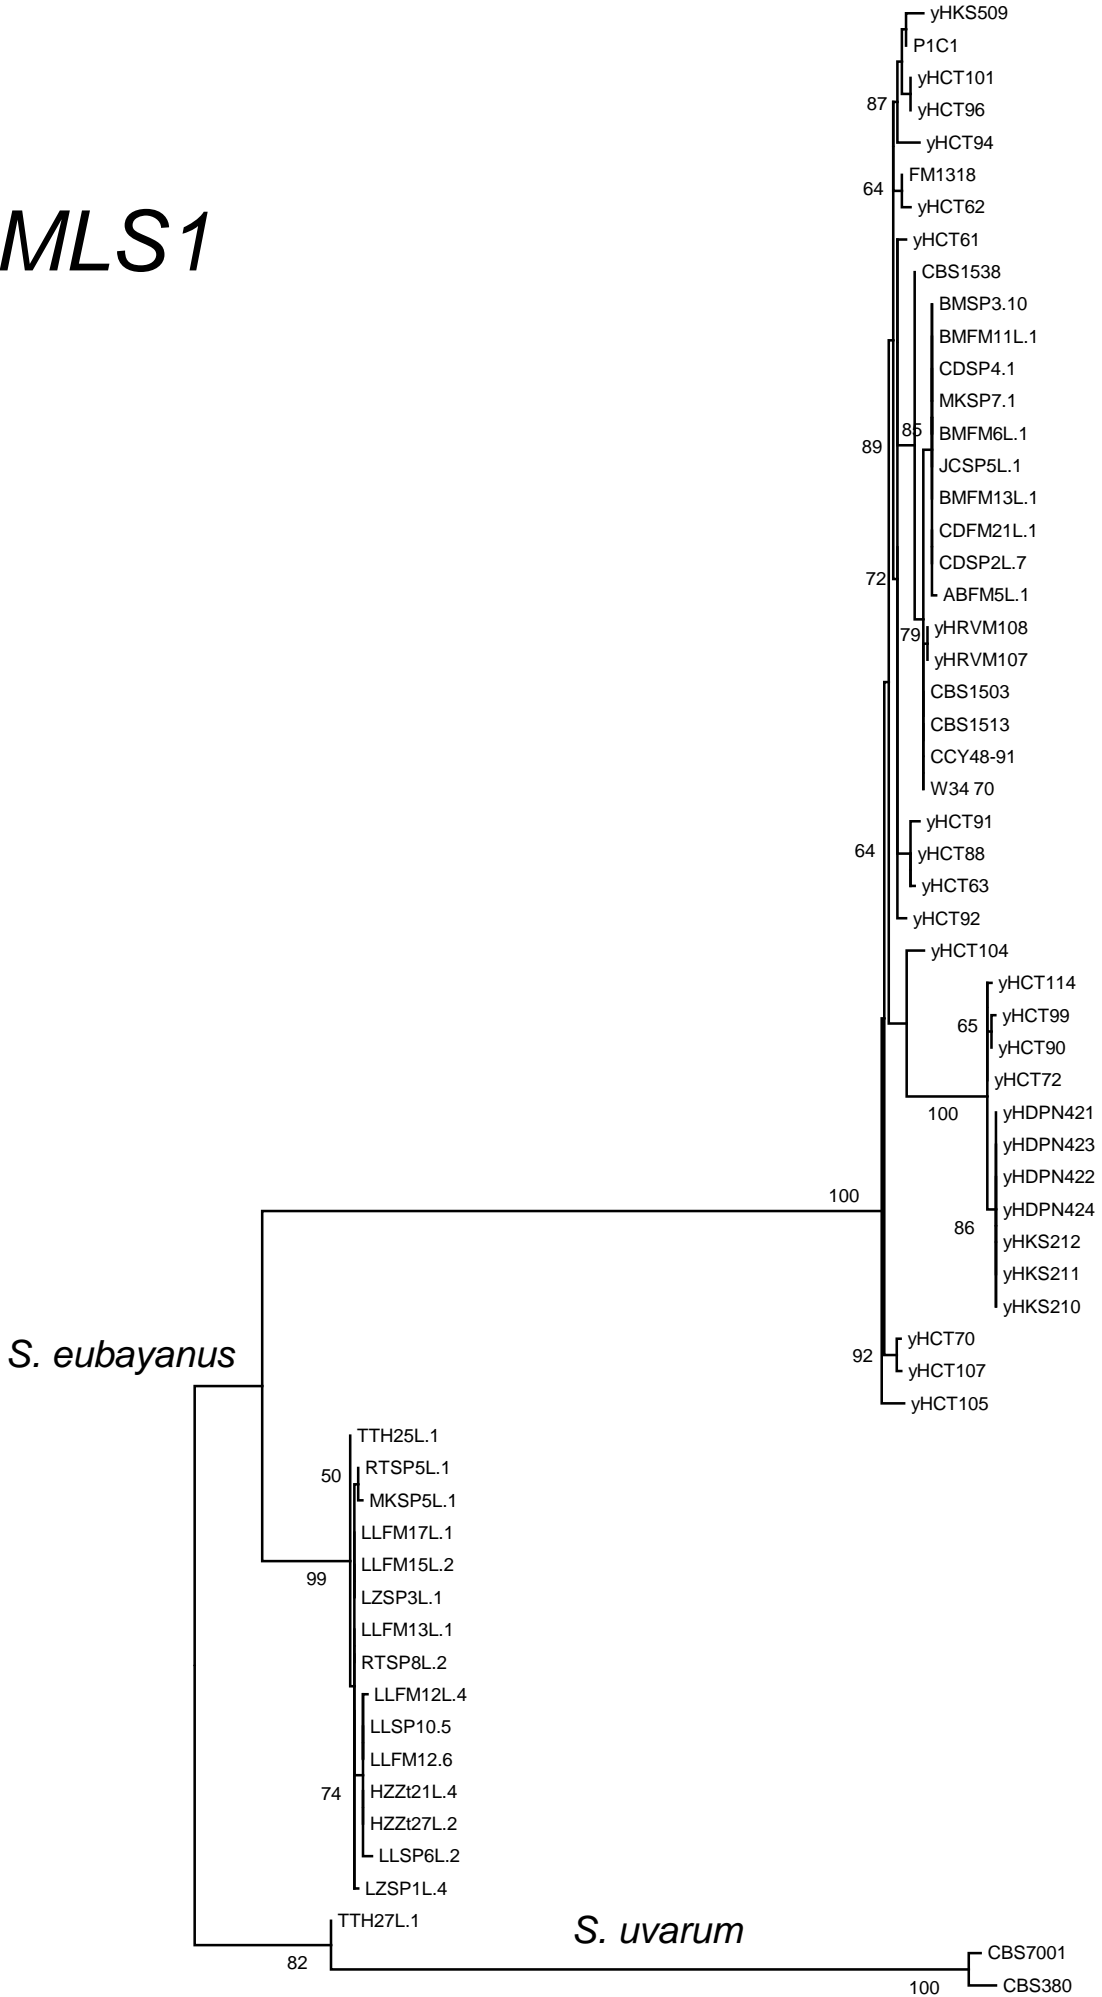

0.01

# K *PDR10*

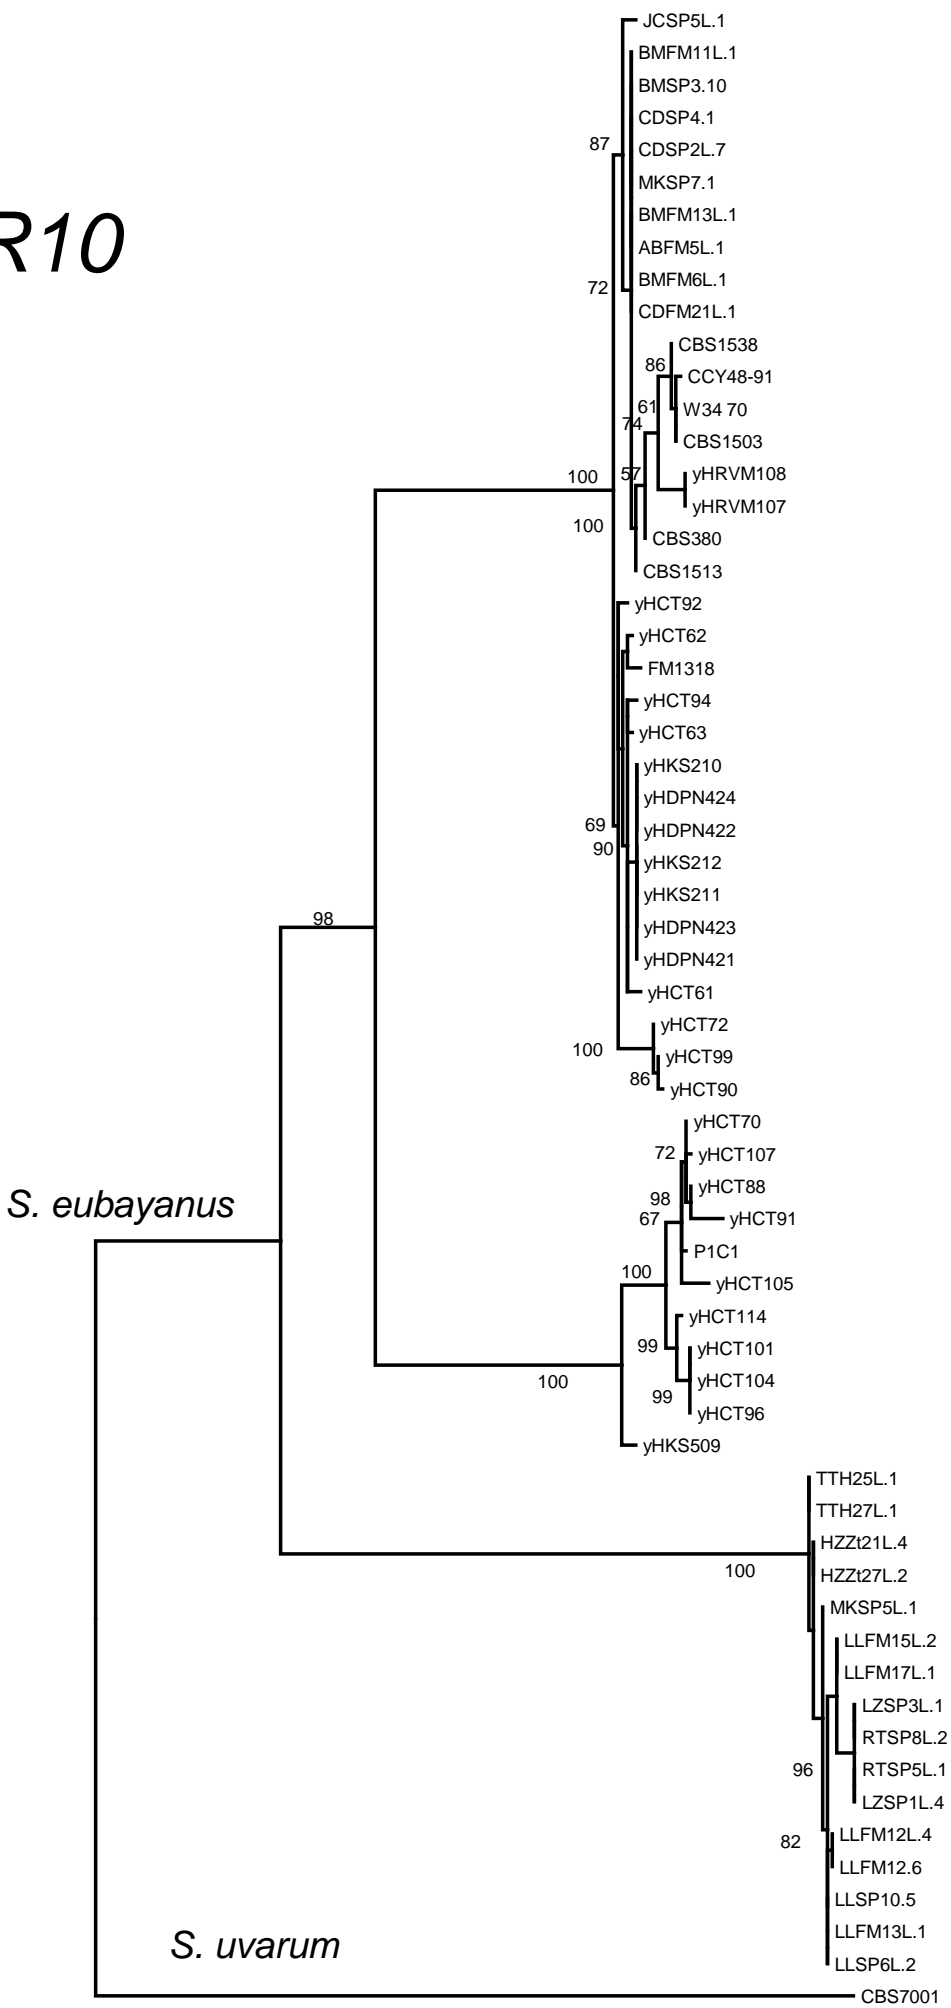

0.01

# L *RIP1*

*S. eubayanus*

*S. uvarum*

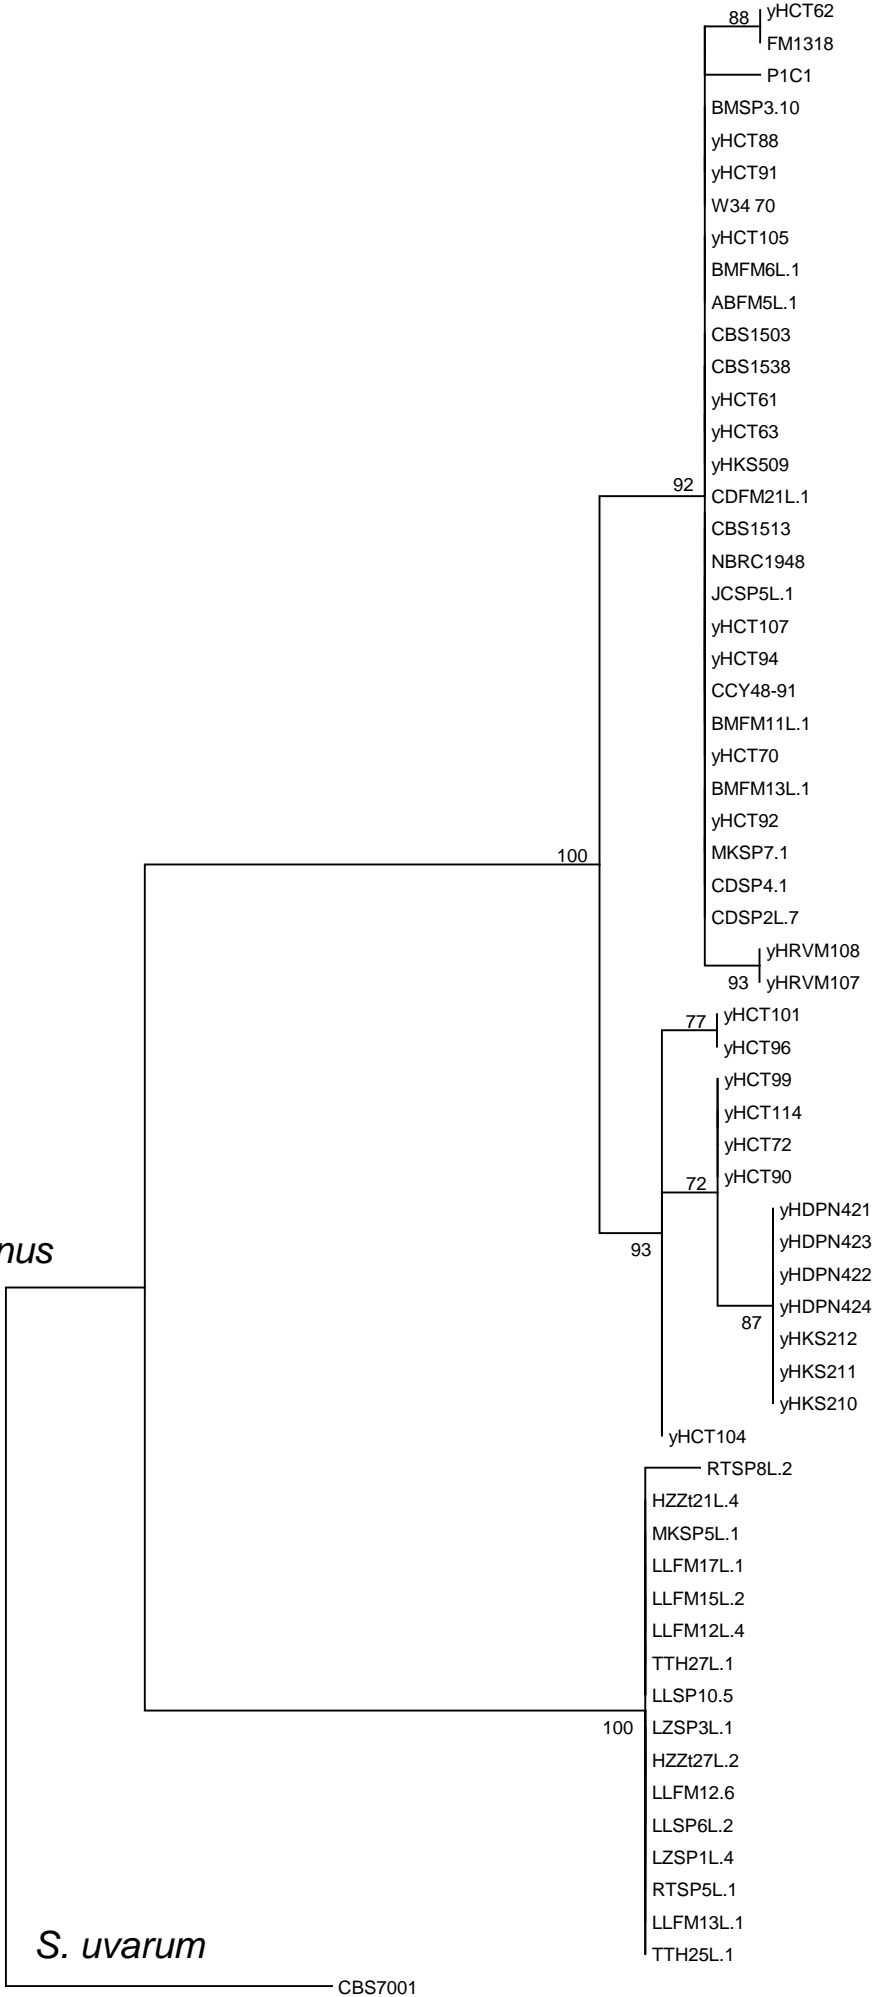

0.01

# M COX2

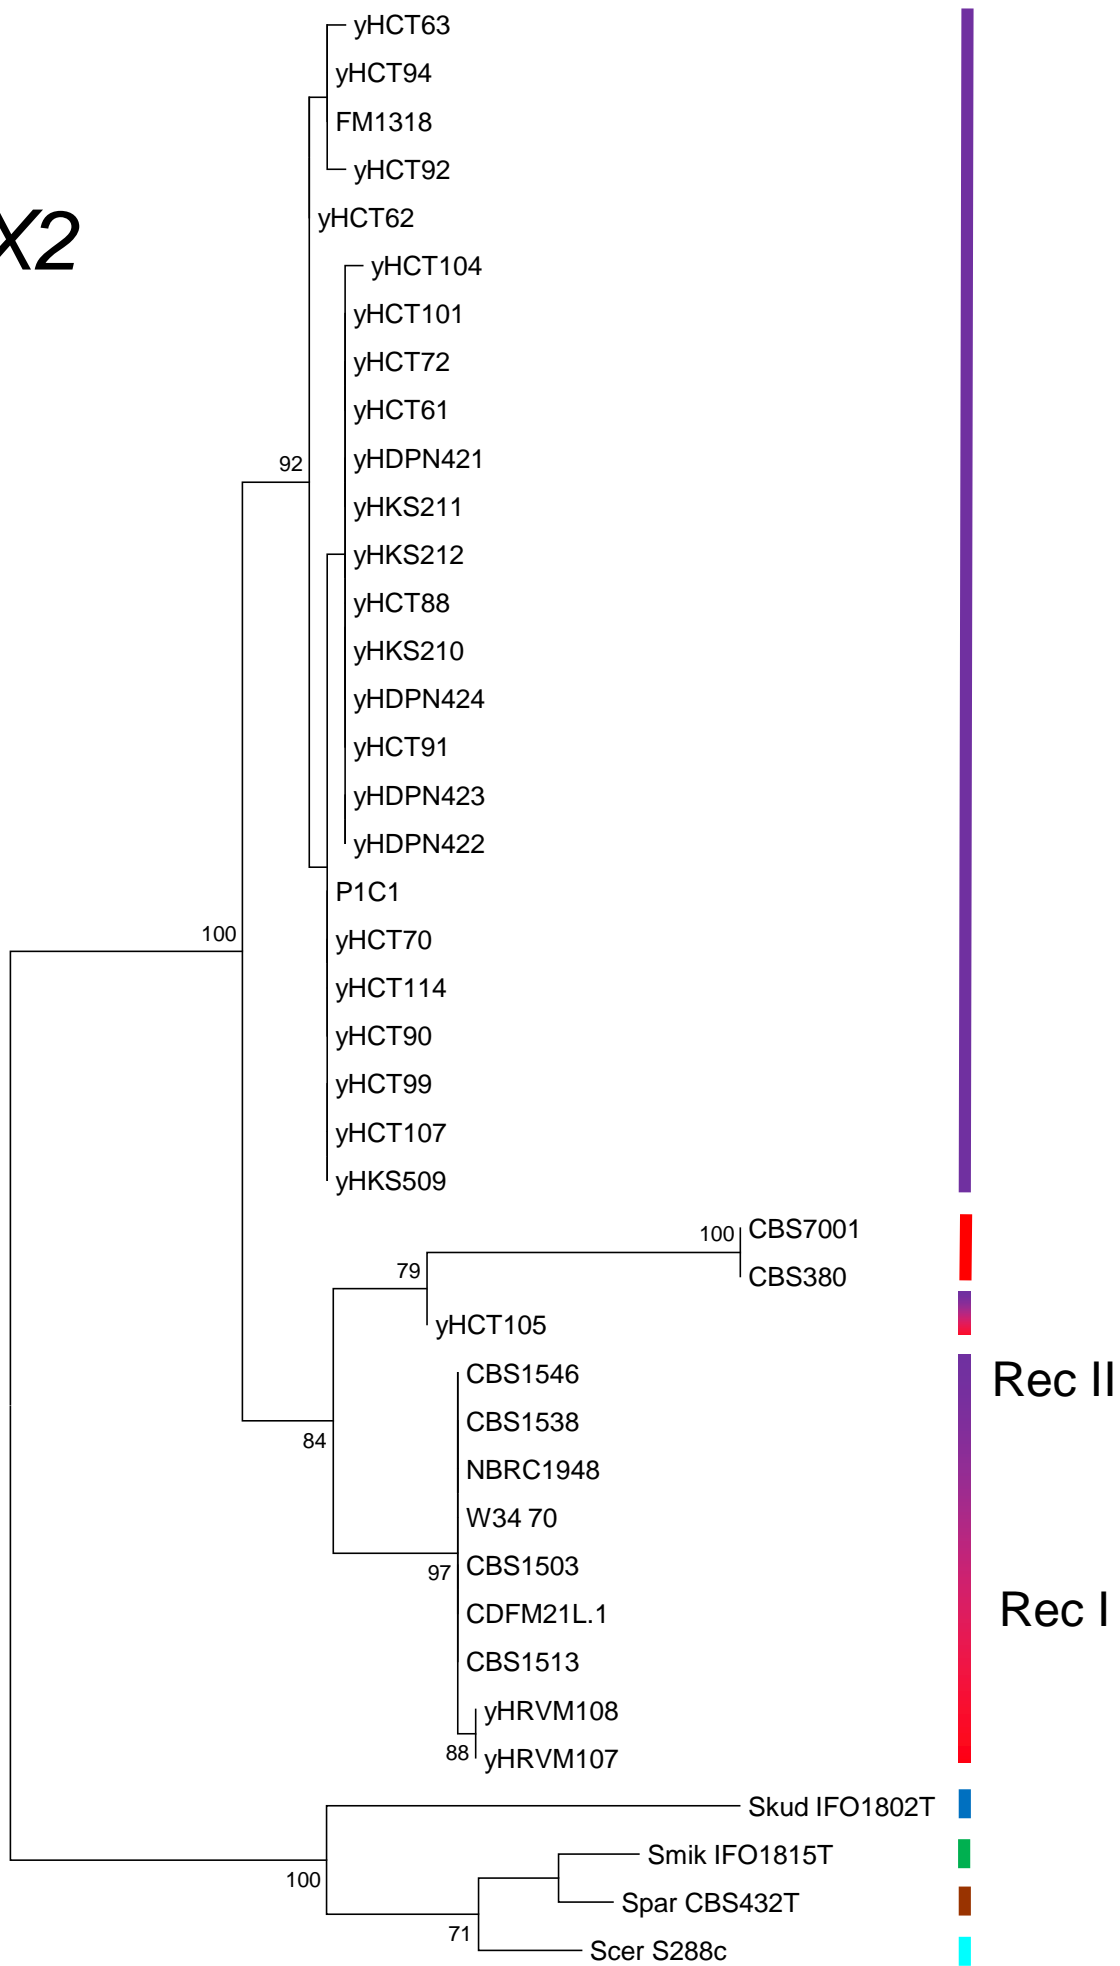

0.01
