# Supplementary material for: Complex Ancestries of Lager-Brewing Hybrids Were Shaped by Standing Variation in the Wild Yeast Saccharomyces eubayanus
Source: PLoS Genet. 2016 Jul 6;12(7):e1006155. doi: 10.1371/journal.pgen.1006155 (PMC4934787; doi:10.1371/journal.pgen.1006155)
Supplement: S2 Table — (XLSX) [file pgen.1006155.s003.xlsx]

## Sheet: FrohbergNC-SaazTi
Table S2. Genes within the regions of interest. These genes were encoded in regions showing Frohberg closely related to North Carolina, and Saaz to Tibet
Gene	Systematic name	Function	π(*100)
ChrVIII: 470Kb-480Kb
Partial PEX27	YOR193W	Peripheral peroxisomal membrane protein; involved in controlling peroxisome size and number
TOA1	YOR194C	TFIIA large subunit	0.523201
SLK19	YOR195W	Kinetochore-associated protein; required for chromosome segregation and kinetochore clustering	0.840223
LIP5	YOR196C	Protein involved in biosynthesis of the coenzyme lipoic acid	0.847389
MCA1	YOR197W	Ca2+-dependent cysteine protease; may cleave specific substrates during the stress response; regulates apoptosis upon H2O2 treatment; required for clearance of insoluble protein aggregates during normal growth; implicated in cell cycle dynamics and lifespan extension; undergoes autocatalytic processing	0.520199
BFR1	YOR198C	Component of mRNP complexes associated with polyribosomes; involved in localization of mRNAs to P bodies; implicated in secretion and nuclear segregation; multicopy suppressor of BFA (Brefeldin A) sensitivity	0.446204
Partial MRM1	YOR201C	Ribose methyltransferase; modifies a functionally critical, conserved nucleotide in mitochondrial 21S rRNA
ChrIII: 171Kb-193Kb
RPS14A	YCR031C	Ribosomal Protein of the small subunit	0.273398
BPH1	YCR032W	Beige protein Homolog	0.747214
SNT1	YCR033W	SaNT domains	1.01253
ELO2	YCR034W	fatty acid Elongation	0.812804
RRP43	YCR035W	Ribosomal RNA processing	0.661396
RBK1	YCR036W	RiBokinase	0.587025
Partial BUD5	YCR038C	Bud site selection
Diversity of partial genes is not reported

## Sheet: SaazNC-FrohbergTi
Table S2. Genes within the regions of interest. These genes were encoded in regions showing Frohberg closely related to Tibet, and Saaz to North Carolina
Gene	Systematic name	Function	π(*100)
ChrX: 446-459
GPI14	YJR013W	GlycosylPhosphatidylInositol anchor biosynthesis	0.445552
MET3	YJR010W	METhionine requiring	0.286712
MHO1	YJR008W	Memo HOmolog	0.363347
SUI2	YJR007W	SUppressor of Initiator codon	0.369549
TDH2	YJR009C	Triose-phosphate DeHydrogenase	0.212594
TMA22	YJR014W	Translation Machinery Associated	0.375
LTR sequence		Absent in W34/70 and Tibet	0.0051

## Sheet: NC Lager
Table S2. Genes within the regions of interest. These genes were encoded in regions showing the Saaz and Frohberg representatives closely related to North Carolina
Gene	Systematic name	Function	π(*100)
ChrIV: 332Kb-362Kb
TSR1	YDL060W	Twenty S rRNA accumulation	0.613183
RAD59	YDL059C	RADiation sensitive	0.530214
USO1	YDL058W	yUSOu - transport in Japanese	0.623462
Hypothetical protein		Potential hydrolase enzyme. Contains a domain of Esterase-lipase	0.794752
MBP1	YDL056W	MluI-box Binding Protein	0.542094
PSA1	YDL055C		0.366378
tRNA
MCH1	YDL054C	MonoCarboxylate transporter Homologue	0.730688
PBP4	YDL053C	Pbp1p Binding Protein	0.72601
SLC1	YDL052C	SphingoLipid Compensation	0.365798
LHP1	YDL051W	La-Homologous Protein	0.233918
KNH1	YDL049C	Kre9(Nine) Homolog	0.279955
STP4	YDL048C	protein with similarity to Stp1p	0.578155
SIT4	YDL047W	Suppressor of Initiation of Transcription	0.348817
NPC2	YDL046W	Niemann Pick type C homolog	0.556597
MRP10	YDL045W-A	Mitochondrial Ribosomal Protein	0.130303
ChrXI: 570Kb-589Kb
Partial TRZ1	YKR079C	tRNase Z
MTD1	YKR080W	Methylene Tetrahydrafolate Dehydrogenase	0.501175
RPF2	YKR081C	Ribosome Production Factor	0.247737
NUP133	YKR082W	Nuclear pore	0.552419
DAD2	YKR083C	Duo1 And Dam1 interacting	0.725321
HBS1	YKR084C	Hsp70 subfamily B Suppressor	0.497698
MRPL20	YKR085C	Mitochondrial Ribosomal Protein, Large subunit	0.554714
PRP16	YKR086W	Pre-mRNA Processing	0.634921
OMA1	YKR087C	Overlapping activity with M-AAA protease	0.492825
TVP38	YKR088C	Tlg2-Vesicle Protein	0.362709
Partial TGL4	YKR089C	TriacylGlycerol Lipase
Diversity of partial genes is not reported
